# Supplementary material for: MhcII Regulates Transmission of α-Synuclein-Seeded Pathology in Mice
Source: MDPI journal article supplement (doi:10.3390/ijms23158175), 2022-07-25
Supplement: s1 [file s1]

Supplementary Table S1: List of antibodies used in this study

| Primary Antibody            | Dilution   | Retrieval         | Secondary Antibody | Source           | Catalogue # |
|-----------------------------|------------|-------------------|--------------------|------------------|-------------|
| <b>Immunohistochemistry</b> |            |                   |                    |                  |             |
| 81A                         | 1 : 10,000 | Water             | Mouse              | Benoit Giasson   | N/A         |
| p62                         | 1 : 1000   | Water             | Rabbit             | Proteintech      | 18420-1-AP  |
| LC3B                        | 1 : 1000   | Citrate, pH 6.0   | Rabbit             | Cell Signaling   | 3868S       |
| Iba-1                       | 1 : 1500   | Citrate, pH 6.0   | Rabbit             | Wako             | 019-19741   |
| CD68                        | 1 : 2000   | Citrate, pH 6.0   | Rabbit             | Invitrogen       | PA5-78996   |
| CD3                         | 1 : 100    | Tris EDTA, pH 9.0 | Mouse              | Abcam            | ab5690      |
| GFAP                        | 1 : 4000   | Water             | Rabbit             | DAKO             | Z0334       |
| TMEM119                     | 1 : 2000   | Citrate, pH 6.0   | Rabbit             | Synaptic Systems | 400002      |
| CD169                       | 1 : 75     | Citrate, pH 6.0   | Mouse              | Novus            | NB600-534   |
| CD4                         | 1 : 500    | Citrate, pH 6.0   | Mouse              | Abcam            | ab183685    |
| <b>Immunoblotting</b>       |            |                   |                    |                  |             |
| Tyrosine Hydroxylase        | 1 : 500    | -                 | Rabbit             | Millipore        | ab152       |
| DARPP32                     | 1 : 500    | -                 | Rabbit             | Cell Signaling   | 2306        |
| Beta Actin (AC-15)          | 1 : 1000   | -                 | Mouse              | Sigma            | A5441       |

Supplementary Table S2: List of genes used to impute cell type-specific DEG and glia-specific signature

| Cell type markers | Gene names                                                                                                                                                                                                   |
|-------------------|--------------------------------------------------------------------------------------------------------------------------------------------------------------------------------------------------------------|
| Astrocyte         | Adcyap1r1, Aldh1l1, Aqp4, Egfr, Entpd2, Gdgd2, Gria2, Il18, Itga7, Nwd1, Ptprz1, Ptx3, Rfx4, Sox9, Vegfa                                                                                                     |
| Endothelial cell  | Cd34, Cldn5, Emcn, Fcgrt, Flt1, H2-D1, Icam2, Lsr, Myct1, Nostrin, Ptgis, Sparc, Srgn, Tie1                                                                                                                  |
| Microglia         | B2m, C1qa, C1qb, C1qc, Ccl12, Ccl2, Ccl3, Cd14, Csf1r, Cst3, Ctsb, Cx3cr1, Gpr84, Il1a, Il1b, Irf8, Itgam, Lag3, Lrrc25, Ncf1, Olfm3, P2ry12, P2ry13, P2ry6, Sirpa, Tgfb1, Tlr2, Tmem119, Tnf, Trem2, Tyrobp |
| Neuron            | Cnr1, Cx3cl1, Dlx1, Dlx2, Gabrb3, Gabrg2, Gria1, Grm2, Islr2, Opcml, Slc17a6, Tbr1                                                                                                                           |
| Oligodendrocyte   | ErbB3, Gjb1, Gpr17, Gsn, Klk6, Mbp, Mog, Myrf, Olig1, Plekha1, Plxnb3, Prkcz, Slpi, Sox10                                                                                                                    |

  

| Glia signatures | Gene names                                                                                                                                                                                                                                                                                                                                                                               |
|-----------------|------------------------------------------------------------------------------------------------------------------------------------------------------------------------------------------------------------------------------------------------------------------------------------------------------------------------------------------------------------------------------------------|
| A1              | Amigo2, Fbln5, Gbp2, Ggta1, H2-D1, H2-T23, Psmb8, Serping1, Srgn                                                                                                                                                                                                                                                                                                                         |
| A2              | B3gnt5, Cd109, Cd14, Clcf1, Emp1, Ptgs2, Ptx3, S100a10, Slc10a6, Sphk1, Tgm1, Tm4sf1                                                                                                                                                                                                                                                                                                     |
| DAM             | Adamts1, Ank, Aplp2, Apoe, Axl, Bhlhe41, C3ar1, Ccl3, Ccl6, Cd14, Cd34, Cd68, Cd74, Cd9, Clec7a, Csf1, Cst7, Ctsb, Ctsd, Ctsl, Egr1, Fabp5, Fcgr1, Flt1, Fos, Gnas, Gpnmb, Grn, H2-T23, Hexb, Igf1, Il1b, Irf8, Itgax, Lamp2, Lpl, Lyz2, Mafk, Merck, Myo5a, Nptn, Plxdc2, Pmp22, Rhob, Serpine2, Sirpa, Slco2b1, Spp1, Sqstm1, Syng1, Timp2, Tlr2, Tnf, Trem2, Tyrobp, Vim, Ywhah, Gusb |
| MGN             | Apoe, Axl, Ccl2, Clec7a, Csf1, Cybb, Gas7, Gpnmb, Itgax, Lag3, Lgals3, Msr1, Spp1, Tlr2                                                                                                                                                                                                                                                                                                  |

Supplementary Table S3. Differential gene expression list of end stage  $\alpha$ -Syn PFF seeded Mhcll<sup>-/-</sup> vs Mhcll<sup>+/+</sup> mice. baseMean, mean transcript levels across all samples; log2FoldChange, log of fold change of RNA; lfcSE, standard error of log of fold change; stat, Wald statistics; padj, p value adjusted for multiple comparison.

|           | baseMean  | log2FoldChange | lfcSE    | stat     | pvalue   | padj     |
|-----------|-----------|----------------|----------|----------|----------|----------|
| Mog       | 1874.4532 | 1.057308455    | 0.090642 | 11.66471 | 1.93E-31 | 1.34E-28 |
| Trim26    | 122.48446 | 1.160070648    | 0.146991 | 7.892134 | 2.97E-15 | 1.03E-12 |
| Hsp90ab1  | 2439.0195 | 0.430975236    | 0.095279 | 4.523286 | 6.09E-06 | 0.001411 |
| Syt4      | 708.00613 | -0.398028966   | 0.090641 | -4.39128 | 1.13E-05 | 0.001958 |
| Igtp      | 75.630598 | 0.806028185    | 0.186909 | 4.312405 | 1.61E-05 | 0.0021   |
| Lgals3    | 1571.7909 | 0.552598677    | 0.12891  | 4.286714 | 1.81E-05 | 0.0021   |
| Slc1a3    | 623.82314 | -0.34041449    | 0.084233 | -4.04134 | 5.31E-05 | 0.00521  |
| Psmb8     | 196.57432 | 0.467983747    | 0.116619 | 4.012944 | 6.00E-05 | 0.00521  |
| Ppp3r1    | 1656.5709 | 0.373640257    | 0.094373 | 3.959178 | 7.52E-05 | 0.005808 |
| Serpina3n | 1584.9554 | -0.523047912   | 0.133548 | -3.91656 | 8.98E-05 | 0.006243 |
| Gnai1     | 706.75943 | 0.309410528    | 0.082344 | 3.757537 | 0.000172 | 0.010842 |
| Gpr17     | 177.67872 | -0.650235425   | 0.174262 | -3.73137 | 0.00019  | 0.01103  |
| Camk2g    | 618.96543 | 0.263545394    | 0.073687 | 3.576539 | 0.000348 | 0.018614 |
| Ubqln1    | 803.86275 | 0.297993556    | 0.083851 | 3.553846 | 0.00038  | 0.018846 |
| Hsd11b1   | 94.296318 | 0.507436922    | 0.143532 | 3.535346 | 0.000407 | 0.018869 |
| Zfp365    | 374.74538 | -0.4185622     | 0.130053 | -3.2184  | 0.001289 | 0.051003 |
| Trim2     | 609.99306 | 0.246205065    | 0.076601 | 3.214137 | 0.001308 | 0.051003 |
| Gal3st1   | 202.27893 | -0.634266118   | 0.198456 | -3.196   | 0.001393 | 0.051003 |
| H2-D1     | 583.68596 | 2.861827293    | 0.89549  | 3.195823 | 0.001394 | 0.051003 |
| Plxnb3    | 146.94443 | -0.591567604   | 0.187968 | -3.14718 | 0.001649 | 0.054153 |
| Atp1b1    | 2316.3187 | -0.346394462   | 0.110419 | -3.1371  | 0.001706 | 0.054153 |
| Nefh      | 1370.7743 | 0.41403938     | 0.132086 | 3.134623 | 0.001721 | 0.054153 |
| Ndufb5    | 661.00682 | -0.35116781    | 0.112457 | -3.12268 | 0.001792 | 0.054153 |
| Cst3      | 16821.859 | -0.264117921   | 0.086128 | -3.06657 | 0.002165 | 0.060939 |
| Olig2     | 67.286866 | -0.833191719   | 0.272027 | -3.0629  | 0.002192 | 0.060939 |
| Ube3c     | 202.7953  | -0.358628082   | 0.118112 | -3.03634 | 0.002395 | 0.061271 |
| Bhlhe41   | 456.78383 | 0.33878164     | 0.111846 | 3.029002 | 0.002454 | 0.061271 |
| Ppp3cb    | 780.47166 | 0.245569469    | 0.081285 | 3.021092 | 0.002519 | 0.061271 |
| Ndufa10   | 870.64724 | 0.209454518    | 0.069435 | 3.016558 | 0.002557 | 0.061271 |
| Ube2d2a/l | 569.02284 | 0.245863434    | 0.08267  | 2.974019 | 0.002939 | 0.068093 |
| Mbp       | 10571.58  | -0.395191879   | 0.133487 | -2.96053 | 0.003071 | 0.068852 |
| Atp6v1g2  | 380.07496 | 0.384558716    | 0.132057 | 2.912065 | 0.00359  | 0.077981 |
| Stat1     | 245.34428 | 0.539446626    | 0.187101 | 2.883178 | 0.003937 | 0.082912 |
| Ass1      | 203.44339 | 0.315929111    | 0.112264 | 2.814164 | 0.00489  | 0.099966 |
| Ccl12     | 274.93028 | 0.334641934    | 0.120378 | 2.779922 | 0.005437 | 0.107967 |
| Cd47      | 404.24568 | 0.275841478    | 0.100907 | 2.733622 | 0.006264 | 0.115905 |
| Lpl       | 292.45375 | 0.613527874    | 0.224655 | 2.730978 | 0.006315 | 0.115905 |
| Eid1      | 1016.362  | 0.171127387    | 0.062782 | 2.72572  | 0.006416 | 0.115905 |
| Gng3      | 2011.2784 | -0.276301708   | 0.101536 | -2.72123 | 0.006504 | 0.115905 |
| Tlr3      | 135.60776 | -0.411231252   | 0.153351 | -2.68163 | 0.007326 | 0.125251 |
| Pias1     | 115.37041 | -0.513002172   | 0.191505 | -2.67879 | 0.007389 | 0.125251 |

|         |           |              |          |          |          |          |
|---------|-----------|--------------|----------|----------|----------|----------|
| Phyh    | 701.60741 | 0.224079372  | 0.08484  | 2.641209 | 0.008261 | 0.131516 |
| Sparc   | 5736.9544 | -0.308205387 | 0.116724 | -2.64045 | 0.00828  | 0.131516 |
| Acat2   | 237.80055 | -0.259986178 | 0.098534 | -2.63855 | 0.008326 | 0.131516 |
| Ptgs2   | 10.821021 | 0.948223383  | 0.361378 | 2.623907 | 0.008693 | NA       |
| Syng1   | 465.93995 | -0.654449785 | 0.250533 | -2.61223 | 0.008995 | 0.13893  |
| Myrf    | 454.35386 | -0.49035988  | 0.18836  | -2.60332 | 0.009233 | 0.139494 |
| Pdha1   | 738.92141 | -0.300288314 | 0.115734 | -2.59465 | 0.009469 | 0.140015 |
| C1ra    | 47.39995  | 0.624244319  | 0.241838 | 2.581251 | 0.009844 | 0.140473 |
| Cd74    | 520.77913 | -0.748754015 | 0.290308 | -2.57917 | 0.009904 | 0.140473 |
| Jak1    | 480.13826 | 0.26342136   | 0.10274  | 2.563963 | 0.010348 | 0.143843 |
| Klrd1   | 10.626503 | 0.948550259  | 0.372753 | 2.544713 | 0.010937 | NA       |
| Ncam1   | 1343.983  | -0.382744187 | 0.151207 | -2.53126 | 0.011365 | 0.154879 |
| Klk6    | 6114.7618 | -0.355451211 | 0.141141 | -2.51841 | 0.011789 | 0.157085 |
| Gbp2    | 83.527058 | 0.607795981  | 0.243419 | 2.496915 | 0.012528 | 0.157085 |
| Sptan1  | 1061.6324 | -0.431641037 | 0.173055 | -2.49425 | 0.012622 | 0.157085 |
| Iigp1   | 106.21205 | 1.135402854  | 0.455977 | 2.490042 | 0.012773 | 0.157085 |
| Uchl1   | 450.66442 | -0.505606978 | 0.203248 | -2.48764 | 0.01286  | 0.157085 |
| Tardbp  | 1462.6528 | -0.181159821 | 0.072843 | -2.48698 | 0.012883 | 0.157085 |
| Aqp4    | 3482.9904 | -0.247507562 | 0.100478 | -2.46331 | 0.013766 | 0.164956 |
| Nlrp1b  | 14.078748 | -0.811418734 | 0.332368 | -2.44132 | 0.014634 | NA       |
| Emp1    | 225.69789 | -0.37434424  | 0.154412 | -2.42432 | 0.015337 | 0.180664 |
| Lsr     | 55.31964  | 0.503315761  | 0.209823 | 2.398762 | 0.016451 | 0.190553 |
| Tap1    | 84.564769 | 0.512654266  | 0.21428  | 2.392445 | 0.016737 | 0.190687 |
| Ccl6    | 213.54621 | -0.329234701 | 0.138969 | -2.36913 | 0.01783  | 0.199869 |
| Irf8    | 80.793228 | 0.391043197  | 0.167107 | 2.340081 | 0.01928  | 0.210726 |
| Gng2    | 517.72144 | -0.378134063 | 0.161758 | -2.33766 | 0.019405 | 0.210726 |
| Itgax   | 137.61235 | -0.485925202 | 0.209017 | -2.32481 | 0.020082 | 0.214726 |
| Itm2a   | 449.64604 | 0.300949066  | 0.130203 | 2.311383 | 0.020812 | 0.215846 |
| Etv5    | 104.58979 | 0.323630893  | 0.140303 | 2.306662 | 0.021074 | 0.215846 |
| Ppt1    | 948.88974 | -0.279113858 | 0.121046 | -2.30585 | 0.021119 | 0.215846 |
| Ifit3   | 810.86692 | 0.799398516  | 0.35035  | 2.281716 | 0.022506 | 0.222001 |
| Wdr35   | 166.25269 | -0.29887702  | 0.131047 | -2.28068 | 0.022567 | 0.222001 |
| Clt     | 1863.2727 | 0.260818612  | 0.114455 | 2.278795 | 0.022679 | 0.222001 |
| Kpna1   | 417.77049 | -0.197184522 | 0.086845 | -2.27053 | 0.023176 | 0.222411 |
| Ptpn11  | 802.06758 | 0.305890991  | 0.135125 | 2.263769 | 0.023588 | 0.222411 |
| Mal2    | 191.4395  | -0.347837049 | 0.153756 | -2.26226 | 0.023681 | 0.222411 |
| Basp1   | 311.01778 | 0.216442609  | 0.095957 | 2.255632 | 0.024094 | 0.223268 |
| Itgam   | 387.2596  | -0.330842707 | 0.148205 | -2.23233 | 0.025593 | 0.23109  |
| Scp2    | 313.97869 | -0.207232729 | 0.092839 | -2.23218 | 0.025603 | 0.23109  |
| Ptprz1  | 992.66044 | -0.226116132 | 0.101799 | -2.22121 | 0.026337 | 0.234669 |
| Fam104a | 179.00521 | 0.253566894  | 0.115021 | 2.204524 | 0.027488 | 0.240615 |
| P2ry12  | 240.9802  | -0.439382521 | 0.199785 | -2.19928 | 0.027858 | 0.240615 |
| Adam22  | 293.11604 | -0.36461587  | 0.165985 | -2.19669 | 0.028043 | 0.240615 |
| Adcy1   | 160.7167  | -0.32113326  | 0.147521 | -2.17687 | 0.029491 | 0.24995  |
| Skp1a   | 1720.3548 | -0.195505423 | 0.090991 | -2.14863 | 0.031664 | 0.261731 |
| Itga7   | 52.495117 | -0.492450647 | 0.229255 | -2.14805 | 0.03171  | 0.261731 |
| Mmut    | 427.32813 | -0.363780953 | 0.170242 | -2.13684 | 0.032611 | 0.261731 |

|          |           |              |          |          |          |          |
|----------|-----------|--------------|----------|----------|----------|----------|
| Selenos  | 147.3617  | -0.224061952 | 0.104913 | -2.1357  | 0.032704 | 0.261731 |
| Acadsb   | 432.78647 | -0.171818915 | 0.080478 | -2.13497 | 0.032763 | 0.261731 |
| F11r     | 190.46121 | 0.232570766  | 0.109191 | 2.129942 | 0.033176 | 0.262018 |
| Kcnd2    | 78.789168 | -0.393263901 | 0.185078 | -2.12486 | 0.033599 | 0.262372 |
| Cybb     | 279.48584 | 0.473326531  | 0.224192 | 2.11126  | 0.03475  | 0.266757 |
| Bhlhe40  | 603.15625 | 0.26593308   | 0.126083 | 2.109193 | 0.034928 | 0.266757 |
| Arntl    | 33.011424 | 0.400152107  | 0.191432 | 2.090306 | 0.03659  | 0.276416 |
| Cx3cl1   | 108.37886 | -0.322493467 | 0.156483 | -2.06089 | 0.039313 | 0.290688 |
| Galc     | 238.56595 | -0.206162922 | 0.100037 | -2.06086 | 0.039316 | 0.290688 |
| Sh2d1a   | 5.7109429 | 1.018641099  | 0.49504  | 2.057695 | 0.039619 | NA       |
| Icam2    | 28.491535 | 0.492053364  | 0.240607 | 2.045048 | 0.04085  | 0.296031 |
| Tnfrsf21 | 380.68661 | -0.359203858 | 0.175681 | -2.04464 | 0.040891 | 0.296031 |
| Csf3r    | 111.63977 | -0.320309064 | 0.157211 | -2.03744 | 0.041605 | 0.296798 |
| Nf1      | 221.50544 | 0.189908986  | 0.093321 | 2.035002 | 0.041851 | 0.296798 |
| Fbln5    | 55.03523  | -0.409430733 | 0.20245  | -2.02238 | 0.043137 | 0.301927 |
| Ube2n    | 1223.8695 | 0.223811526  | 0.110829 | 2.019429 | 0.043443 | 0.301927 |
| Mertk    | 135.35243 | -0.361011063 | 0.179653 | -2.00949 | 0.044485 | 0.306109 |
| Gad1     | 305.27413 | -0.281984027 | 0.14178  | -1.98888 | 0.046714 | 0.318299 |
| Klrk1    | 5.6173365 | 0.911927986  | 0.458609 | 1.988466 | 0.04676  | NA       |
| Tspo     | 144.22557 | 0.281604655  | 0.142982 | 1.969514 | 0.048894 | 0.329916 |
| Ip6k2    | 238.97648 | -0.170793289 | 0.087538 | -1.95108 | 0.051048 | 0.335584 |
| Stab1    | 34.873178 | 0.489657313  | 0.2513   | 1.948499 | 0.051355 | 0.335584 |
| Cltc     | 3503.3031 | 0.098696865  | 0.05071  | 1.946318 | 0.051617 | 0.335584 |
| Clec7a   | 798.18188 | 0.374335638  | 0.192444 | 1.945162 | 0.051756 | 0.335584 |
| Mtor     | 136.31499 | -0.437007838 | 0.22504  | -1.94191 | 0.052148 | 0.335584 |
| Slc2a5   | 30.8667   | 0.432183543  | 0.223385 | 1.934705 | 0.053026 | 0.335668 |
| Adcy5    | 208.46942 | -0.256151654 | 0.132454 | -1.93389 | 0.053127 | 0.335668 |
| Fcrlb    | 8.9917274 | 0.731102565  | 0.378411 | 1.932032 | 0.053356 | NA       |
| Tfec     | 3.3334692 | 1.104798526  | 0.575055 | 1.921204 | 0.054706 | NA       |
| Stambpl1 | 135.80632 | 0.218185399  | 0.114271 | 1.909374 | 0.056214 | 0.350411 |
| Kitl     | 306.30482 | 0.345020369  | 0.180885 | 1.907398 | 0.056469 | 0.350411 |
| Mx1      | 17.092153 | 0.653812862  | 0.346324 | 1.887865 | 0.059044 | 0.363147 |
| Gdnf     | 12.050057 | 0.593451528  | 0.317346 | 1.870046 | 0.061477 | NA       |
| Akt3     | 599.93662 | 0.294720389  | 0.157748 | 1.868305 | 0.06172  | 0.371504 |
| Gjb1     | 441.64292 | -0.350719505 | 0.187776 | -1.86776 | 0.061796 | 0.371504 |
| Igf1     | 61.765318 | 0.347301706  | 0.186153 | 1.865674 | 0.062087 | 0.371504 |
| Fos      | 80.92334  | -0.482032099 | 0.25899  | -1.8612  | 0.062716 | 0.371504 |
| Htr5a    | 19.171054 | -0.46408079  | 0.24981  | -1.85774 | 0.063206 | 0.371504 |
| Fcgr1    | 253.54297 | 0.224988699  | 0.121449 | 1.852541 | 0.063948 | 0.371504 |
| Olfml3   | 210.58738 | 0.527998352  | 0.285224 | 1.851173 | 0.064145 | 0.371504 |
| Ncf1     | 150.33961 | -0.324795979 | 0.176306 | -1.84223 | 0.065441 | 0.375883 |
| Adora2b  | 93.46206  | -0.273809889 | 0.149115 | -1.83624 | 0.066323 | 0.377821 |
| Pik3cb   | 308.66911 | 0.139281628  | 0.076035 | 1.831815 | 0.066979 | 0.378458 |
| Gprasp1  | 1012.6333 | -0.177804253 | 0.097543 | -1.82284 | 0.068328 | 0.382969 |
| Chil1    | 358.53248 | -0.251036719 | 0.138429 | -1.81347 | 0.06976  | 0.387866 |
| Chchd3   | 237.9922  | 0.29038794   | 0.161481 | 1.798278 | 0.072133 | 0.395316 |
| Hmox1    | 217.6212  | -0.213143872 | 0.11857  | -1.79762 | 0.072238 | 0.395316 |

|          |           |              |          |          |          |          |
|----------|-----------|--------------|----------|----------|----------|----------|
| Erlec1   | 309.08565 | -0.203312509 | 0.113407 | -1.79278 | 0.073009 | 0.396415 |
| Ret      | 119.20689 | -0.248228371 | 0.139145 | -1.78395 | 0.074432 | 0.39891  |
| Gabra5   | 159.68841 | 0.284847998  | 0.159774 | 1.782816 | 0.074616 | 0.39891  |
| Fbxw11   | 825.87879 | 0.175733796  | 0.09897  | 1.775634 | 0.075793 | 0.401399 |
| Atp6v1b2 | 1561.6958 | 0.143987493  | 0.081213 | 1.772951 | 0.076237 | 0.401399 |
| Spi1     | 155.69356 | 0.303951848  | 0.171965 | 1.767523 | 0.077141 | 0.403104 |
| Gria1    | 238.15101 | 0.187814298  | 0.106632 | 1.761337 | 0.078181 | 0.405493 |
| Camk2a   | 187.69915 | -0.413220167 | 0.235158 | -1.7572  | 0.078884 | 0.405598 |
| Dnm3     | 965.06592 | -0.191661742 | 0.109411 | -1.75176 | 0.079816 | 0.405598 |
| P2rx7    | 144.78139 | 0.189617658  | 0.108293 | 1.750962 | 0.079952 | 0.405598 |
| Reep5    | 734.97757 | -0.162109219 | 0.092988 | -1.74333 | 0.081276 | 0.406632 |
| Becn1    | 248.83702 | -0.214164502 | 0.122868 | -1.74304 | 0.081326 | 0.406632 |
| Gfap     | 22049.388 | -0.180222144 | 0.1039   | -1.73457 | 0.082817 | 0.409599 |
| Prkacb   | 172.04373 | 0.15892729   | 0.091707 | 1.732984 | 0.083098 | 0.409599 |
| Zpr1     | 129.51459 | -0.259195478 | 0.150258 | -1.72501 | 0.084526 | 0.410434 |
| Aars     | 297.46177 | -0.173684558 | 0.100703 | -1.72472 | 0.084577 | 0.410434 |
| Ctsf     | 466.85062 | -0.164375188 | 0.095447 | -1.72216 | 0.08504  | 0.410434 |
| Pmp22    | 598.38559 | -0.221079433 | 0.129008 | -1.71369 | 0.086586 | 0.414522 |
| Slc38a1  | 746.34506 | -0.214996552 | 0.125655 | -1.71101 | 0.087079 | 0.414522 |
| Rfx4     | 108.84778 | -0.432110146 | 0.253374 | -1.70542 | 0.088116 | 0.416602 |
| Jak2     | 215.75661 | -0.158718959 | 0.093443 | -1.69856 | 0.089403 | 0.41983  |
| Tcl1     | 8.8523714 | 0.675430019  | 0.399104 | 1.692364 | 0.090577 | NA       |
| Stmn1    | 1230.059  | 0.144623964  | 0.085531 | 1.690903 | 0.090855 | 0.423788 |
| Dmd      | 158.26018 | -0.371967449 | 0.220922 | -1.68371 | 0.092239 | 0.425154 |
| Syt13    | 64.512802 | -0.477531687 | 0.283735 | -1.68302 | 0.092372 | 0.425154 |
| Ifnar1   | 271.71485 | -0.202107061 | 0.120819 | -1.67281 | 0.094365 | 0.429938 |
| Erbb3    | 57.942357 | -0.362471687 | 0.217122 | -1.66944 | 0.095031 | 0.429938 |
| Ppm1a    | 1018.9574 | 0.182742197  | 0.109541 | 1.668246 | 0.095267 | 0.429938 |
| Dnm1     | 1390.6011 | 0.22327637   | 0.134966 | 1.65431  | 0.098064 | 0.439708 |
| Nrxn1    | 354.84728 | -0.17317563  | 0.105042 | -1.64863 | 0.099224 | 0.442055 |
| Hdc      | 16.963328 | -0.426318927 | 0.26103  | -1.63322 | 0.102423 | 0.44671  |
| Olfr110  | 34.289962 | -0.471484672 | 0.288782 | -1.63267 | 0.102539 | 0.44671  |
| Lpar6    | 82.233997 | -0.256336306 | 0.157027 | -1.63244 | 0.102588 | 0.44671  |
| Khgrp    | 145.26126 | -0.359046372 | 0.220106 | -1.63124 | 0.10284  | 0.44671  |
| Sec61a2  | 126.63314 | -0.204284899 | 0.125483 | -1.62799 | 0.103526 | 0.446899 |
| Cd3d     | 6.0230777 | 0.86809331   | 0.535375 | 1.621467 | 0.104917 | NA       |
| Prkab2   | 60.336281 | -0.378387972 | 0.233962 | -1.61731 | 0.105812 | 0.453946 |
| Gria2    | 222.60342 | -0.246602281 | 0.153016 | -1.61161 | 0.107046 | 0.455186 |
| Grm1     | 79.197653 | -0.240562064 | 0.149423 | -1.60994 | 0.107411 | 0.455186 |
| Crot     | 296.52563 | -0.179197137 | 0.112219 | -1.59685 | 0.1103   | 0.464598 |
| Ina      | 766.23897 | 0.211992775  | 0.133136 | 1.592297 | 0.111318 | 0.46606  |
| Slc17a7  | 10.444248 | -0.750539849 | 0.472429 | -1.58868 | 0.112132 | NA       |
| Trem2    | 666.33627 | -0.240749026 | 0.151583 | -1.58823 | 0.112235 | 0.467084 |
| Eno2     | 768.32064 | -0.279975263 | 0.177119 | -1.58072 | 0.113942 | 0.471367 |
| Cntf     | 334.37102 | -0.267123602 | 0.169876 | -1.57246 | 0.115843 | 0.474428 |
| Cldn5    | 194.11017 | 0.293541435  | 0.186782 | 1.571574 | 0.116049 | 0.474428 |
| Fth1     | 128692.88 | 0.18815523   | 0.119947 | 1.568649 | 0.11673  | 0.474428 |

|          |           |              |          |          |          |          |
|----------|-----------|--------------|----------|----------|----------|----------|
| Ifit1    | 129.39144 | 0.712194217  | 0.456467 | 1.560232 | 0.118705 | 0.476441 |
| Flt1     | 79.377064 | -0.437098508 | 0.280394 | -1.55887 | 0.119027 | 0.476441 |
| Atp6v1g1 | 383.31382 | -0.143764209 | 0.092287 | -1.5578  | 0.119282 | 0.476441 |
| Atp9a    | 632.96663 | -0.162221368 | 0.104353 | -1.55455 | 0.120054 | 0.476552 |
| Eif2b5   | 226.81059 | 0.182730149  | 0.117744 | 1.551923 | 0.120681 | 0.476552 |
| Opcml    | 178.72277 | 0.235176125  | 0.152662 | 1.540503 | 0.123438 | 0.482215 |
| Sugt1    | 677.99359 | 0.140723373  | 0.091365 | 1.540237 | 0.123503 | 0.482215 |
| Hsd17b4  | 351.48855 | -0.153854514 | 0.100978 | -1.52364 | 0.127599 | 0.493717 |
| Dlat     | 477.53543 | 0.131237727  | 0.086196 | 1.522559 | 0.127869 | 0.493717 |
| Elmo1    | 340.24975 | -0.196200785 | 0.129427 | -1.51591 | 0.129541 | 0.495753 |
| Igfbp5   | 238.83764 | -0.60529287  | 0.400097 | -1.51286 | 0.130314 | 0.495753 |
| Ninj2    | 23.737128 | 0.391709542  | 0.259436 | 1.50985  | 0.131082 | 0.495753 |
| Prkcd    | 226.71602 | -0.254890782 | 0.168899 | -1.50913 | 0.131266 | 0.495753 |
| Acly     | 583.5735  | 0.138977465  | 0.092258 | 1.506406 | 0.131963 | 0.495753 |
| C3       | 1498.7634 | 0.184503373  | 0.122913 | 1.501085 | 0.133334 | 0.498209 |
| Slc8a1   | 612.80008 | 0.159964199  | 0.107536 | 1.487544 | 0.136871 | 0.505962 |
| P2ry13   | 85.472892 | -0.2244      | 0.151154 | -1.48458 | 0.137655 | 0.505962 |
| Il21r    | 25.69821  | 0.309405481  | 0.208705 | 1.482504 | 0.138206 | 0.505962 |
| Hk1      | 817.27226 | -0.115100829 | 0.077893 | -1.47768 | 0.139494 | 0.505962 |
| Islr2    | 8.7901542 | 0.548376398  | 0.372538 | 1.472    | 0.141021 | NA       |
| Sh3gl2   | 889.78371 | 0.11918041   | 0.080982 | 1.471699 | 0.141102 | 0.505962 |
| Lamp1    | 2868.4823 | -0.11604135  | 0.07887  | -1.47131 | 0.141208 | 0.505962 |
| Tbk1     | 125.47592 | -0.167932413 | 0.114264 | -1.46969 | 0.141646 | 0.505962 |
| Atp2a2   | 1962.5764 | 0.105883646  | 0.072099 | 1.468591 | 0.141944 | 0.505962 |
| Abcc3    | 27.89612  | -0.306935579 | 0.209009 | -1.46853 | 0.14196  | 0.505962 |
| Hspa1a/b | 31.875257 | -0.633486759 | 0.435467 | -1.45473 | 0.145744 | 0.512976 |
| Gls      | 658.79433 | -0.114040305 | 0.078452 | -1.45363 | 0.14605  | 0.512976 |
| Ccl3     | 291.82845 | -0.182084757 | 0.125371 | -1.45237 | 0.1464   | 0.512976 |
| Msr1     | 63.479521 | -0.470152597 | 0.324101 | -1.45064 | 0.146881 | 0.512976 |
| Nrcam    | 808.21759 | -0.171822731 | 0.118663 | -1.44799 | 0.147619 | 0.512976 |
| Kcnab1   | 341.85207 | 0.143690461  | 0.099587 | 1.442864 | 0.149059 | 0.515403 |
| Ptx3     | 89.912418 | 0.320406271  | 0.223525 | 1.433427 | 0.151736 | 0.519311 |
| Thy1     | 1395.9536 | 0.130881889  | 0.091512 | 1.430223 | 0.152653 | 0.519311 |
| B2m      | 8611.0494 | 0.199210993  | 0.139806 | 1.424914 | 0.154182 | 0.519311 |
| Ywhah    | 2156.2754 | 0.138574065  | 0.09749  | 1.421413 | 0.155197 | 0.519311 |
| Amigo1   | 213.09208 | -0.176533174 | 0.124375 | -1.41937 | 0.155792 | 0.519311 |
| Fig4     | 174.17032 | -0.156413237 | 0.110226 | -1.41902 | 0.155894 | 0.519311 |
| Gabrb3   | 366.40436 | 0.122650613  | 0.086556 | 1.417006 | 0.156481 | 0.519311 |
| Kras     | 433.9137  | 0.213911409  | 0.15106  | 1.41607  | 0.156755 | 0.519311 |
| Dnajc11  | 121.35632 | -0.226739251 | 0.160211 | -1.41526 | 0.156993 | 0.519311 |
| Slc12a5  | 400.51012 | -0.303718229 | 0.21503  | -1.41245 | 0.157818 | 0.519311 |
| Chrn2    | 40.912861 | -0.261469977 | 0.185381 | -1.41044 | 0.158408 | 0.519311 |
| Dld      | 963.74242 | 0.134107663  | 0.095374 | 1.406127 | 0.159686 | 0.521042 |
| Chrm3    | 23.995339 | -0.470808729 | 0.336827 | -1.39778 | 0.16218  | 0.526707 |
| Csnk2a1  | 821.62415 | 0.164162068  | 0.117707 | 1.394661 | 0.163118 | 0.527288 |
| P2ry1    | 120.58565 | 0.168473099  | 0.12122  | 1.389814 | 0.164585 | 0.529277 |
| Psmd14   | 876.16178 | 0.163591456  | 0.118219 | 1.383796 | 0.166421 | 0.529277 |

|         |           |              |          |          |          |          |
|---------|-----------|--------------|----------|----------|----------|----------|
| Scoc    | 1662.8108 | 0.142867866  | 0.103323 | 1.382736 | 0.166746 | 0.529277 |
| Olig1   | 136.85573 | -0.298269962 | 0.215727 | -1.38263 | 0.166779 | 0.529277 |
| Rlim    | 517.64835 | -0.166935913 | 0.121056 | -1.379   | 0.167895 | 0.529831 |
| Mapk9   | 553.3045  | 0.170666869  | 0.124547 | 1.370303 | 0.170592 | 0.529831 |
| Pak1    | 1239.878  | -0.116864666 | 0.085285 | -1.37029 | 0.170597 | 0.529831 |
| Bdnf    | 49.804448 | 0.231033117  | 0.168633 | 1.370032 | 0.170677 | 0.529831 |
| Amph    | 387.12264 | 0.154558631  | 0.113034 | 1.367366 | 0.171511 | 0.529831 |
| Adora1  | 79.94243  | -0.219829714 | 0.16091  | -1.36617 | 0.171886 | 0.529831 |
| Rasgrp1 | 39.853995 | -0.342863887 | 0.25165  | -1.36246 | 0.173053 | 0.529831 |
| Cacnb2  | 81.299309 | 0.192552402  | 0.141487 | 1.360923 | 0.173538 | 0.529831 |
| Mag     | 1077.4779 | -0.129545792 | 0.095251 | -1.36005 | 0.173815 | 0.529831 |
| Mapk13  | 8.0136185 | -0.536475885 | 0.394765 | -1.35898 | 0.174154 | NA       |
| Lta4h   | 216.29231 | 0.116002207  | 0.085799 | 1.352019 | 0.176369 | 0.534963 |
| Sqstm1  | 1593.4872 | 0.131693456  | 0.097556 | 1.349931 | 0.177038 | 0.534963 |
| Cd244a  | 28.821191 | 0.358394183  | 0.268503 | 1.334784 | 0.181947 | 0.547416 |
| Rapgef2 | 91.192181 | -0.198405621 | 0.149333 | -1.32862 | 0.183975 | 0.548888 |
| Csnk2a2 | 237.03865 | 0.112884261  | 0.08524  | 1.324311 | 0.1854   | 0.548888 |
| Atp8a2  | 258.61364 | 0.130204296  | 0.098511 | 1.321725 | 0.18626  | 0.548888 |
| Nkg7    | 9.5843273 | 0.46710709   | 0.353881 | 1.319955 | 0.18685  | NA       |
| Agmo    | 181.88822 | -0.158633516 | 0.12024  | -1.31931 | 0.187065 | 0.548888 |
| Bcas1   | 1897.043  | 0.193742189  | 0.147035 | 1.317665 | 0.187616 | 0.548888 |
| Pecam1  | 77.541243 | 0.268312979  | 0.20375  | 1.316871 | 0.187882 | 0.548888 |
| Ltc4s   | 10.746517 | -0.460400978 | 0.350357 | -1.31409 | 0.188815 | NA       |
| Dnajb9  | 446.6126  | 0.156678972  | 0.119288 | 1.313451 | 0.189031 | 0.548888 |
| Ppp2r2b | 228.11531 | 0.182856446  | 0.139294 | 1.312736 | 0.189272 | 0.548888 |
| Tyrobp  | 4269.6744 | -0.184709484 | 0.140792 | -1.31193 | 0.189544 | 0.548888 |
| Ncam2   | 517.10656 | -0.127695036 | 0.097641 | -1.3078  | 0.190941 | 0.55064  |
| Cnot10  | 170.80909 | -0.203937066 | 0.156909 | -1.29972 | 0.193698 | 0.55271  |
| Cntnap2 | 113.96544 | -0.162199339 | 0.124948 | -1.29813 | 0.194242 | 0.55271  |
| Olfr3   | 141.72095 | 0.234260952  | 0.18065  | 1.296764 | 0.194712 | 0.55271  |
| Ccnb1   | 47.735866 | 0.282305152  | 0.217993 | 1.295018 | 0.195314 | 0.55271  |
| Gabrd   | 15.174883 | -0.399213329 | 0.308408 | -1.29443 | 0.195516 | NA       |
| Por     | 194.21341 | 0.136832369  | 0.105737 | 1.294086 | 0.195636 | 0.55271  |
| Mef2a   | 325.69066 | -0.11430013  | 0.088756 | -1.2878  | 0.197816 | 0.556607 |
| Pccb    | 261.32854 | 0.138154369  | 0.107495 | 1.285213 | 0.198718 | 0.556891 |
| Tmem88b | 14.288884 | 0.379788241  | 0.295628 | 1.284684 | 0.198903 | NA       |
| Hectd1  | 425.40137 | -0.153610847 | 0.120887 | -1.2707  | 0.203837 | 0.568942 |
| Cdk5r1  | 62.584806 | 0.219864932  | 0.174345 | 1.261091 | 0.207276 | 0.576227 |
| Cspg4   | 100.40111 | -0.26940865  | 0.214257 | -1.25741 | 0.208606 | 0.577614 |
| Tspan7  | 1274.2608 | -0.204525036 | 0.16316  | -1.25352 | 0.210016 | 0.579212 |
| Eloc    | 1505.4724 | 0.154113205  | 0.123503 | 1.247852 | 0.212085 | 0.582606 |
| Xk      | 54.318142 | 0.203669628  | 0.163743 | 1.243838 | 0.213559 | 0.584034 |
| Myorg   | 62.072712 | -0.276864003 | 0.223557 | -1.23845 | 0.215549 | 0.584034 |
| Gusb    | 318.29154 | -0.194654859 | 0.157257 | -1.23782 | 0.215784 | 0.584034 |
| Slc6a1  | 720.38009 | -0.159091844 | 0.128577 | -1.23733 | 0.215966 | 0.584034 |
| Tmem100 | 26.40596  | 0.269404504  | 0.220099 | 1.224012 | 0.220948 | 0.594824 |
| Dnaja2  | 366.75633 | 0.130491912  | 0.106776 | 1.222104 | 0.221668 | 0.594824 |



|           |           |              |          |          |          |          |
|-----------|-----------|--------------|----------|----------|----------|----------|
| Kir3dl1/2 | 3.7545661 | 0.664465819  | 0.544626 | 1.220041 | 0.222449 | NA       |
| C1qa      | 5241.7278 | -0.189567018 | 0.155685 | -1.21763 | 0.223363 | 0.597068 |
| Ctnnb1    | 2025.9804 | -0.132987785 | 0.11027  | -1.20602 | 0.227809 | 0.606468 |
| Plekhb1   | 8409.8753 | -0.109667853 | 0.091161 | -1.20302 | 0.22897  | 0.606468 |
| Tgfb1     | 212.73631 | 0.177369225  | 0.147695 | 1.200916 | 0.229784 | 0.606468 |
| Dnm1l     | 604.44791 | -0.097249496 | 0.081087 | -1.19932 | 0.230405 | 0.606468 |
| Xcl1      | 3.3868262 | 0.676217818  | 0.565679 | 1.195409 | 0.231927 | NA       |
| Unc79     | 449.74714 | 0.171852723  | 0.144433 | 1.189844 | 0.234108 | 0.606468 |
| Egfr      | 51.742478 | -0.254190867 | 0.214112 | -1.18719 | 0.235153 | 0.606468 |
| Acsl4     | 275.80934 | 0.104055845  | 0.087661 | 1.187021 | 0.235219 | 0.606468 |
| Psen1     | 267.72087 | -0.107193096 | 0.090323 | -1.18677 | 0.235318 | 0.606468 |
| Ywhae     | 5258.8499 | 0.187025919  | 0.157644 | 1.186384 | 0.235471 | 0.606468 |
| Panx1     | 91.607231 | -0.198852761 | 0.168154 | -1.18257 | 0.236982 | 0.606468 |
| Psmc6     | 1246.2019 | 0.181994035  | 0.154201 | 1.180241 | 0.237904 | 0.606468 |
| Trac      | 35.053927 | 0.340416975  | 0.288551 | 1.179748 | 0.2381   | 0.606468 |
| Atg12     | 332.27095 | -0.104554254 | 0.088648 | -1.17944 | 0.238224 | 0.606468 |
| Tlr2      | 128.98382 | 0.182651081  | 0.155602 | 1.173838 | 0.24046  | 0.607476 |
| Hmgb1     | 1304.9569 | 0.088473867  | 0.075408 | 1.173274 | 0.240686 | 0.607476 |
| Entpd1    | 117.48408 | 0.158248363  | 0.135037 | 1.171888 | 0.241242 | 0.607476 |
| Sox2      | 354.31756 | -0.148687752 | 0.127365 | -1.16742 | 0.243041 | 0.609797 |
| Tgm1      | 103.08585 | 0.255027971  | 0.219419 | 1.162285 | 0.24512  | 0.612799 |
| Arpc5l    | 511.38571 | 0.126936739  | 0.109577 | 1.15843  | 0.246689 | 0.614511 |
| Pde1a     | 165.59418 | 0.177751196  | 0.154342 | 1.151673 | 0.249455 | 0.61713  |
| Adgra2    | 48.676006 | -0.290757878 | 0.252498 | -1.15153 | 0.249516 | 0.61713  |
| Tanc2     | 258.94131 | -0.154490731 | 0.134743 | -1.14656 | 0.251562 | 0.618502 |
| Atp6v1d   | 912.5628  | 0.108648167  | 0.094818 | 1.145866 | 0.251851 | 0.618502 |
| Vegfa     | 262.79514 | -0.292896126 | 0.256616 | -1.14138 | 0.253712 | 0.620879 |
| Mto1      | 133.67173 | -0.143679629 | 0.12625  | -1.13806 | 0.255097 | 0.622079 |
| Kcnq3     | 157.45338 | -0.171976764 | 0.151852 | -1.13253 | 0.257412 | 0.623862 |
| Pnoc      | 16.855822 | -0.301946521 | 0.266731 | -1.13203 | 0.257624 | 0.623862 |
| Fgf2      | 65.803218 | -0.284180327 | 0.252022 | -1.1276  | 0.259488 | 0.626195 |
| Psma5     | 723.01154 | -0.135796654 | 0.12098  | -1.12248 | 0.26166  | 0.628913 |
| Acat1     | 686.05783 | -0.104274474 | 0.093046 | -1.12068 | 0.262424 | 0.628913 |
| Akt1      | 643.19784 | -0.189277496 | 0.169546 | -1.11638 | 0.264261 | 0.631138 |
| Ptger4    | 20.772915 | 0.268841525  | 0.24147  | 1.113353 | 0.265557 | 0.631542 |
| Egf       | 10.653555 | -0.388404483 | 0.349937 | -1.10993 | 0.26703  | NA       |
| Tln2      | 203.49956 | 0.147273462  | 0.132779 | 1.109161 | 0.267361 | 0.631542 |
| Grik2     | 161.95454 | -0.140751291 | 0.127002 | -1.10826 | 0.267751 | 0.631542 |
| Gad2      | 410.39215 | 0.121564437  | 0.110192 | 1.103209 | 0.269936 | 0.631542 |
| Tmem47    | 806.96831 | 0.07614732   | 0.069145 | 1.101263 | 0.270782 | 0.631542 |
| Kctd12    | 27.125107 | -0.335635608 | 0.305085 | -1.10014 | 0.271272 | 0.631542 |
| Spp1      | 12229.762 | -0.274650062 | 0.24979  | -1.09952 | 0.271539 | 0.631542 |
| Gjd2      | 41.899896 | 0.183890265  | 0.167458 | 1.098129 | 0.272148 | 0.631542 |
| Esam      | 77.87286  | 0.218867229  | 0.1995   | 1.097077 | 0.272608 | 0.631542 |
| Tomm20    | 1074.8225 | 0.106218339  | 0.097546 | 1.088904 | 0.276196 | 0.637729 |
| Parp2     | 70.320105 | -0.172077114 | 0.159145 | -1.08126 | 0.279582 | 0.638564 |
| Nefl      | 853.36151 | -0.201309552 | 0.186268 | -1.08075 | 0.279807 | 0.638564 |

|           |           |              |          |          |          |          |
|-----------|-----------|--------------|----------|----------|----------|----------|
| Gpnmb     | 2207.5584 | 0.445009966  | 0.411893 | 1.080402 | 0.279963 | 0.638564 |
| Abcb1a    | 236.19172 | 0.162559475  | 0.151056 | 1.076152 | 0.281859 | 0.638564 |
| Cacna1b   | 47.971948 | -0.311379564 | 0.289682 | -1.0749  | 0.282419 | 0.638564 |
| Rnf10     | 544.76841 | 0.07783929   | 0.072462 | 1.074215 | 0.282726 | 0.638564 |
| Ccdc127   | 389.85738 | 0.108844044  | 0.10138  | 1.073627 | 0.28299  | 0.638564 |
| Cd3g      | 4.7548169 | 0.510446472  | 0.477912 | 1.068077 | 0.285486 | NA       |
| Gabarapl1 | 2550.2403 | 0.063002213  | 0.059109 | 1.065862 | 0.286486 | 0.641721 |
| Atg2b     | 201.98611 | -0.09835087  | 0.092819 | -1.0596  | 0.289326 | 0.641721 |
| Rock2     | 368.65227 | -0.084868838 | 0.080236 | -1.05774 | 0.290174 | 0.641721 |
| Aldh1l1   | 514.53156 | 0.097993458  | 0.092759 | 1.056435 | 0.29077  | 0.641721 |
| Grin2a    | 34.552683 | -0.233492204 | 0.2213   | -1.05509 | 0.291383 | 0.641721 |
| Nostrin   | 28.484702 | 0.257888012  | 0.244587 | 1.054383 | 0.291707 | 0.641721 |
| Dlx1      | 13.402489 | 0.38278727   | 0.363264 | 1.053744 | 0.292    | NA       |
| Supt7l    | 67.176016 | -0.180727708 | 0.172115 | -1.05004 | 0.293699 | 0.641721 |
| Sumo1     | 722.70323 | 0.182592844  | 0.174339 | 1.047341 | 0.294942 | 0.641721 |
| Nrg1      | 187.12004 | -0.152632391 | 0.145739 | -1.0473  | 0.294962 | 0.641721 |
| Cep68     | 42.26412  | -0.193819053 | 0.185375 | -1.04555 | 0.295767 | 0.641721 |
| Tbp       | 122.97185 | -0.158184535 | 0.151626 | -1.04325 | 0.29683  | 0.641721 |
| Vim       | 5245.7072 | -0.126862376 | 0.121611 | -1.04318 | 0.296864 | 0.641721 |
| Ranbp9    | 570.92804 | -0.112544255 | 0.107947 | -1.04259 | 0.29714  | 0.641721 |
| Wasf1     | 290.12385 | 0.112453156  | 0.10817  | 1.039597 | 0.298527 | 0.641721 |
| Ap3m2     | 224.07183 | 0.121444628  | 0.116941 | 1.038509 | 0.299033 | 0.641721 |
| Cnp       | 6236.4109 | -0.087103879 | 0.083896 | -1.03823 | 0.299162 | 0.641721 |
| Sec23a    | 507.92717 | -0.100527039 | 0.097225 | -1.03396 | 0.301153 | 0.642121 |
| Ywhag     | 2885.6642 | -0.281309541 | 0.272093 | -1.03387 | 0.301197 | 0.642121 |
| Ifngr2    | 230.68169 | 0.126896856  | 0.123693 | 1.025902 | 0.304938 | 0.648109 |
| Orc3      | 374.26851 | -0.093083102 | 0.090978 | -1.02314 | 0.306243 | 0.648899 |
| Scn1a     | 684.85212 | 0.133505296  | 0.130755 | 1.021033 | 0.307239 | 0.64903  |
| Diaph1    | 203.19174 | 0.110736454  | 0.109143 | 1.014597 | 0.310298 | 0.653506 |
| Lars      | 235.29772 | -0.151298755 | 0.149544 | -1.01173 | 0.311666 | 0.654404 |
| Rab3a     | 3487.7493 | 0.113944319  | 0.113094 | 1.007521 | 0.313684 | 0.656659 |
| Atp2b4    | 176.76711 | -0.110160002 | 0.109596 | -1.00515 | 0.314825 | 0.657068 |
| Tpsab1    | 1.9261988 | -0.799604679 | 0.795543 | -1.00511 | 0.314846 | NA       |
| Sybu      | 100.29081 | -0.182854776 | 0.183376 | -0.99716 | 0.318687 | 0.661492 |
| Gabra3    | 360.92919 | -0.099282732 | 0.09979  | -0.99492 | 0.319774 | 0.661492 |
| Trim68    | 34.849754 | -0.214336492 | 0.215442 | -0.99487 | 0.319801 | 0.661492 |
| Nos1ap    | 52.202605 | 0.158221744  | 0.15967  | 0.990928 | 0.321721 | 0.663489 |
| Adora3    | 21.521207 | 0.24709913   | 0.252084 | 0.980226 | 0.326974 | 0.672329 |
| Serping1  | 254.64378 | -0.230904182 | 0.237155 | -0.97364 | 0.330233 | 0.676938 |
| Fcgr4     | 68.200533 | 0.162646769  | 0.167642 | 0.970203 | 0.331946 | 0.676938 |
| Cpne2     | 184.12568 | 0.106373989  | 0.109685 | 0.969816 | 0.332138 | 0.676938 |
| Tnfrsf17  | 4.9215535 | -0.465944332 | 0.484031 | -0.96263 | 0.335731 | NA       |
| Slc7a8    | 55.150222 | 0.170034827  | 0.176662 | 0.962489 | 0.335804 | 0.678367 |
| Prkdc     | 121.56528 | -0.16178179  | 0.168427 | -0.96054 | 0.336782 | 0.678367 |
| Tbr1      | 2.8464574 | 0.682673455  | 0.711029 | 0.96012  | 0.336995 | NA       |
| Acsl3     | 920.71579 | -0.102476828 | 0.106882 | -0.95878 | 0.337668 | 0.678367 |
| Syt1      | 407.06009 | -0.135277583 | 0.141158 | -0.95834 | 0.337889 | 0.678367 |

|          |           |              |          |          |          |          |
|----------|-----------|--------------|----------|----------|----------|----------|
| Slc25a12 | 419.52887 | 0.093921865  | 0.098013 | 0.958263 | 0.33793  | 0.678367 |
| Adh5     | 779.17266 | -0.084661773 | 0.088489 | -0.95675 | 0.338696 | 0.678367 |
| S100b    | 4291.5359 | -0.083513413 | 0.087607 | -0.95327 | 0.340452 | 0.679446 |
| Lilrb4a  | 392.24821 | 0.184554079  | 0.19406  | 0.951015 | 0.341597 | 0.679446 |
| Kcnv1    | 14.306965 | 0.275494113  | 0.289859 | 0.950441 | 0.341888 | NA       |
| B4galt5  | 104.95474 | 0.117090353  | 0.123267 | 0.949892 | 0.342167 | 0.679446 |
| Ppp2ca   | 2257.3667 | 0.153035721  | 0.163539 | 0.935777 | 0.349388 | 0.691809 |
| Bub3     | 446.3065  | -0.080018872 | 0.085835 | -0.93225 | 0.35121  | 0.69344  |
| Hexb     | 5667.5092 | 0.102804069  | 0.110818 | 0.927688 | 0.35357  | 0.696121 |
| Gnas     | 2693.9491 | -0.125399957 | 0.136277 | -0.92019 | 0.357476 | 0.701824 |
| Ptgis    | 52.51672  | 0.296674598  | 0.324228 | 0.915019 | 0.360181 | 0.705144 |
| Il34     | 147.1898  | 0.161873024  | 0.177614 | 0.911375 | 0.362098 | 0.706904 |
| Sphk1    | 13.300197 | -0.256213109 | 0.283024 | -0.90527 | 0.365323 | NA       |
| Sox9     | 225.40581 | -0.147108973 | 0.163527 | -0.8996  | 0.368332 | 0.715726 |
| Ctss     | 6103.8089 | 0.149901307  | 0.16728  | 0.89611  | 0.370194 | 0.715726 |
| Gdgd2    | 73.79019  | -0.141957923 | 0.158721 | -0.89438 | 0.371116 | 0.715726 |
| Bax      | 158.12954 | -0.086888801 | 0.097186 | -0.89404 | 0.371299 | 0.715726 |
| Ubqln2   | 519.52957 | 0.077259225  | 0.0865   | 0.893171 | 0.371765 | 0.715726 |
| Nos2     | 5.8390106 | 0.373302679  | 0.419177 | 0.89056  | 0.373165 | NA       |
| Mapt     | 575.78452 | -0.171044153 | 0.192659 | -0.88781 | 0.374643 | 0.719273 |
| Nap1l2   | 150.46006 | 0.129210915  | 0.146514 | 0.881904 | 0.377829 | 0.723391 |
| Rab1a    | 1932.8128 | 0.058700438  | 0.066823 | 0.87844  | 0.379705 | 0.723407 |
| Prkcz    | 182.02205 | -0.105037742 | 0.119974 | -0.87551 | 0.381299 | 0.723407 |
| Cd200    | 293.4306  | -0.083766822 | 0.095801 | -0.87438 | 0.38191  | 0.723407 |
| Dagla    | 68.430352 | -0.217337865 | 0.249257 | -0.87194 | 0.383239 | 0.723407 |
| Slc9b2   | 31.311907 | -0.200965687 | 0.230876 | -0.87045 | 0.384054 | 0.723407 |
| Itpr1    | 155.26355 | 0.104647398  | 0.120284 | 0.87     | 0.3843   | 0.723407 |
| Dlgap1   | 62.323491 | 0.21571604   | 0.248379 | 0.868495 | 0.385123 | 0.723407 |
| Ahcyl1   | 1341.5154 | 0.06753252   | 0.078703 | 0.858069 | 0.390854 | 0.731869 |
| Grk3     | 124.45417 | -0.126245913 | 0.147401 | -0.85648 | 0.391734 | 0.731869 |
| Rorb     | 160.33573 | 0.097226749  | 0.114256 | 0.850952 | 0.394796 | 0.735612 |
| Stat3    | 621.42614 | 0.100477793  | 0.118561 | 0.84748  | 0.396728 | 0.735792 |
| Npas2    | 55.413957 | -0.133652265 | 0.158026 | -0.84576 | 0.397687 | 0.735792 |
| Hdac2    | 429.48245 | 0.143478478  | 0.169782 | 0.845076 | 0.398069 | 0.735792 |
| Nkiras1  | 397.21648 | 0.134449408  | 0.160704 | 0.836629 | 0.402801 | 0.739919 |
| Snap25   | 3862.7104 | 0.08879827   | 0.10633  | 0.835118 | 0.403651 | 0.739919 |
| Plp1     | 31388.409 | -0.071240822 | 0.085419 | -0.83401 | 0.404273 | 0.739919 |
| Tie1     | 37.865975 | 0.169722113  | 0.203964 | 0.832119 | 0.405342 | 0.739919 |
| Unc80    | 290.94121 | 0.168240231  | 0.202305 | 0.831618 | 0.405624 | 0.739919 |
| Kcnq5    | 5.4234541 | -0.563273312 | 0.680514 | -0.82772 | 0.40783  | NA       |
| Cyp4x1   | 39.066986 | 0.150588842  | 0.182278 | 0.826149 | 0.40872  | 0.743613 |
| Grin3a   | 232.49003 | 0.088972166  | 0.108237 | 0.822009 | 0.411072 | 0.745939 |
| Il10     | 4.8292915 | 0.404073389  | 0.493542 | 0.818721 | 0.412945 | NA       |
| Aplp2    | 3003.7559 | 0.096015098  | 0.117595 | 0.816492 | 0.414219 | 0.749693 |
| Glr3     | 1649.5558 | 0.08655022   | 0.106617 | 0.811784 | 0.416916 | 0.752614 |
| Adgrg1   | 48.862233 | -0.181692379 | 0.225144 | -0.80701 | 0.419663 | 0.755611 |
| Cacna2d3 | 69.541818 | 0.124042365  | 0.154164 | 0.804611 | 0.421044 | 0.756139 |

|          |           |              |          |          |          |          |
|----------|-----------|--------------|----------|----------|----------|----------|
| Th       | 10.995084 | 0.268544382  | 0.336539 | 0.797958 | 0.424895 | NA       |
| Map1lc3b | 910.3592  | -0.064250487 | 0.08056  | -0.79754 | 0.425135 | 0.758741 |
| Tada2b   | 104.88561 | -0.137769167 | 0.172945 | -0.79661 | 0.42568  | 0.758741 |
| Ctsl     | 692.67526 | -0.109247423 | 0.13738  | -0.79522 | 0.426484 | 0.758741 |
| Tenm4    | 85.462991 | 0.133733102  | 0.16836  | 0.794329 | 0.427004 | 0.758741 |
| Atf2     | 227.55968 | -0.137552511 | 0.173544 | -0.79261 | 0.428006 | 0.758741 |
| Ulk1     | 72.208847 | -0.158127011 | 0.200154 | -0.79003 | 0.429513 | 0.758741 |
| Sirt5    | 72.602394 | -0.111099214 | 0.140817 | -0.78896 | 0.430135 | 0.758741 |
| Cd200r1  | 18.73966  | -0.201238324 | 0.25648  | -0.78462 | 0.432678 | 0.759447 |
| Chn1     | 609.86524 | -0.079327007 | 0.101112 | -0.78454 | 0.432721 | 0.759447 |
| Atp2b3   | 99.086435 | 0.121717726  | 0.15664  | 0.777054 | 0.437127 | 0.765247 |
| Apoe     | 15204.802 | 0.122184945  | 0.157995 | 0.773346 | 0.439318 | 0.76715  |
| Sirpa    | 548.12334 | 0.106669023  | 0.138911 | 0.767895 | 0.44255  | 0.770857 |
| P2ry6    | 33.283184 | 0.177519575  | 0.232042 | 0.765031 | 0.444253 | 0.77189  |
| Ywhaq    | 3266.4069 | -0.112765722 | 0.14906  | -0.75651 | 0.449343 | 0.775798 |
| Cd68     | 1217.6283 | -0.117460834 | 0.155611 | -0.75483 | 0.450348 | 0.775798 |
| Atr      | 88.516236 | -0.117453394 | 0.155865 | -0.75356 | 0.451113 | 0.775798 |
| Samm50   | 441.02722 | -0.057820392 | 0.076769 | -0.75317 | 0.451348 | 0.775798 |
| Nptn     | 2093.0585 | -0.088125324 | 0.117196 | -0.75195 | 0.452084 | 0.775798 |
| Gria3    | 574.52499 | -0.097788928 | 0.130524 | -0.7492  | 0.453735 | 0.776714 |
| Gmpr2    | 133.0535  | -0.094798158 | 0.127276 | -0.74482 | 0.456378 | 0.779319 |
| Ncr1     | 3.8504186 | -0.414629584 | 0.557264 | -0.74405 | 0.456849 | NA       |
| Slpi     | 9.5184486 | -0.258408964 | 0.347719 | -0.74315 | 0.457388 | NA       |
| Cd9      | 2679.7968 | -0.165382948 | 0.225271 | -0.73415 | 0.462856 | 0.784442 |
| Egr1     | 141.63485 | 0.129803223  | 0.177091 | 0.732975 | 0.463574 | 0.784442 |
| Atp5pb   | 1497.62   | -0.093790967 | 0.128086 | -0.73225 | 0.464017 | 0.784442 |
| Rbx1     | 1170.4409 | 0.065806324  | 0.090197 | 0.729588 | 0.465642 | 0.784442 |
| Psmc6    | 838.68343 | -0.083975395 | 0.115154 | -0.72925 | 0.465851 | 0.784442 |
| Plcb4    | 309.34938 | -0.127165362 | 0.174496 | -0.72876 | 0.46615  | 0.784442 |
| Cd19     | 5.9717202 | -0.32313758  | 0.44342  | -0.72874 | 0.466162 | NA       |
| Ddah1    | 651.801   | -0.065021271 | 0.0897   | -0.72487 | 0.46853  | 0.78534  |
| Gabra1   | 254.65045 | -0.09306721  | 0.128525 | -0.72412 | 0.468993 | 0.78534  |
| Fpr1     | 16.721101 | 0.213040463  | 0.295696 | 0.72047  | 0.471236 | NA       |
| Atp1a1   | 906.79417 | -0.082814851 | 0.115094 | -0.71954 | 0.471809 | 0.78534  |
| Atp6v1a  | 1231.8436 | -0.063965249 | 0.088912 | -0.71942 | 0.471879 | 0.78534  |
| Tomm70a  | 1138.0115 | 0.125759218  | 0.175122 | 0.718124 | 0.472681 | 0.78534  |
| Rims1    | 146.4238  | -0.148194468 | 0.206729 | -0.71685 | 0.473464 | 0.78534  |
| Adar     | 237.30685 | -0.128228671 | 0.180791 | -0.70926 | 0.478161 | 0.791243 |
| Gpr84    | 19.189658 | 0.166054933  | 0.235789 | 0.704253 | 0.481275 | 0.794504 |
| Serinc3  | 1483.948  | -0.073145822 | 0.104257 | -0.70159 | 0.482932 | 0.79535  |
| Ccna1    | 4.2294614 | 0.353747628  | 0.507067 | 0.697635 | 0.485406 | NA       |
| Fcrls    | 861.25331 | -0.112933485 | 0.1625   | -0.69498 | 0.48707  | 0.800268 |
| Cd209e   | 5.059266  | 0.347436836  | 0.502496 | 0.691422 | 0.4893   | NA       |
| Abca1    | 875.95671 | -0.102156048 | 0.147961 | -0.69042 | 0.489928 | 0.802506 |
| Syn2     | 617.46133 | -0.097389897 | 0.141476 | -0.68839 | 0.49121  | 0.802506 |
| Dusp3    | 236.97319 | -0.084053964 | 0.12247  | -0.68632 | 0.492511 | 0.802506 |
| Hspa9    | 1525.7618 | -0.041694208 | 0.060984 | -0.6837  | 0.494167 | 0.802506 |

|           |           |              |          |          |          |          |
|-----------|-----------|--------------|----------|----------|----------|----------|
| Dclk1     | 316.73745 | -0.076267555 | 0.111615 | -0.68331 | 0.49441  | 0.802506 |
| Cd109     | 300.00941 | -0.169179944 | 0.248134 | -0.68181 | 0.49536  | 0.802506 |
| Prf1      | 10.341763 | 0.22959862   | 0.33797  | 0.679345 | 0.496919 | NA       |
| Calm1     | 4176.7485 | 0.038778041  | 0.057349 | 0.676182 | 0.498925 | 0.803584 |
| Aldh1a1   | 879.90142 | 0.059111142  | 0.087755 | 0.673596 | 0.500568 | 0.803584 |
| Extl2     | 406.11619 | 0.069240209  | 0.103068 | 0.671792 | 0.501716 | 0.803584 |
| Bin1      | 1082.0661 | 0.046576644  | 0.069727 | 0.667987 | 0.504142 | 0.803584 |
| Abce1     | 360.36108 | 0.081307037  | 0.121786 | 0.667624 | 0.504374 | 0.803584 |
| Camk2d    | 620.58239 | -0.071385849 | 0.106974 | -0.66732 | 0.504569 | 0.803584 |
| Ank       | 955.45848 | 0.071594004  | 0.107612 | 0.6653   | 0.505859 | 0.803584 |
| Slc24a3   | 92.140966 | -0.099935329 | 0.150346 | -0.6647  | 0.50624  | 0.803584 |
| Rhob      | 203.86295 | -0.092173007 | 0.139048 | -0.66289 | 0.507403 | 0.803584 |
| Fbxl3     | 490.43238 | 0.049851626  | 0.075236 | 0.662599 | 0.507587 | 0.803584 |
| Tm4sf1    | 1153.2853 | 0.117488274  | 0.178728 | 0.657359 | 0.51095  | 0.805685 |
| Eif2ak1   | 229.13866 | 0.077017007  | 0.118222 | 0.651463 | 0.514748 | 0.805685 |
| H2-T23    | 173.98888 | -0.101977261 | 0.156718 | -0.65071 | 0.515237 | 0.805685 |
| Ptprm     | 155.86026 | 0.07798036   | 0.120331 | 0.64805  | 0.516953 | 0.805685 |
| Ckb       | 9582.6565 | -0.056410168 | 0.087108 | -0.64759 | 0.51725  | 0.805685 |
| Opa1      | 328.39887 | 0.084226618  | 0.130162 | 0.647092 | 0.517573 | 0.805685 |
| Tjp1      | 607.47533 | -0.08379666  | 0.129805 | -0.64556 | 0.518567 | 0.805685 |
| Lyz2      | 2666.4165 | 0.22397552   | 0.347755 | 0.644061 | 0.519536 | 0.805685 |
| Cttnbp2nl | 66.840573 | 0.128400959  | 0.199975 | 0.642087 | 0.520817 | 0.805685 |
| Alas1     | 174.61888 | 0.070188072  | 0.109448 | 0.641293 | 0.521332 | 0.805685 |
| Prkag1    | 542.49514 | 0.091728288  | 0.143186 | 0.640621 | 0.521769 | 0.805685 |
| Cd14      | 142.8712  | -0.081149483 | 0.127148 | -0.63823 | 0.523325 | 0.805685 |
| Trim45    | 46.453852 | -0.12599596  | 0.197748 | -0.63715 | 0.524025 | 0.805685 |
| Inpp5f    | 769.62006 | -0.074053558 | 0.11654  | -0.63544 | 0.525144 | 0.805685 |
| Epb41l3   | 762.70484 | -0.069974895 | 0.111563 | -0.62722 | 0.530513 | 0.812128 |
| Psmc10    | 160.71376 | -0.085608734 | 0.137687 | -0.62176 | 0.534099 | 0.813716 |
| Abcg2     | 306.3544  | 0.095554246  | 0.153861 | 0.621042 | 0.534572 | 0.813716 |
| Klhl12    | 144.54819 | 0.069585435  | 0.112181 | 0.620297 | 0.535062 | 0.813716 |
| Gsn       | 1521.438  | 0.120685496  | 0.196121 | 0.615363 | 0.538315 | 0.816875 |
| Nsf       | 2974.6542 | 0.05216507   | 0.085041 | 0.613413 | 0.539603 | 0.817046 |
| Rad23b    | 559.75371 | -0.049711735 | 0.081336 | -0.61119 | 0.541073 | 0.81749  |
| Plip      | 260.25591 | -0.072368968 | 0.118806 | -0.60914 | 0.542434 | 0.817769 |
| Psmc2     | 939.22305 | -0.041278178 | 0.068297 | -0.60439 | 0.545585 | 0.81849  |
| Cd33      | 101.8155  | 0.071109803  | 0.117953 | 0.602863 | 0.5466   | 0.81849  |
| Crkl      | 152.57032 | -0.07682404  | 0.127697 | -0.60161 | 0.547434 | 0.81849  |
| Mbtps1    | 181.23043 | 0.072866567  | 0.122249 | 0.596051 | 0.551141 | 0.81849  |
| Ptk2b     | 66.871906 | -0.089373775 | 0.150324 | -0.59454 | 0.552151 | 0.81849  |
| C1s1      | 33.022355 | 0.133286759  | 0.224883 | 0.592693 | 0.553387 | 0.81849  |
| Usp2      | 182.32667 | 0.093266656  | 0.157416 | 0.592484 | 0.553527 | 0.81849  |
| Ticam1    | 43.182022 | -0.112796083 | 0.190379 | -0.59248 | 0.553528 | 0.81849  |
| Tsc1      | 154.35259 | -0.06191568  | 0.104766 | -0.59099 | 0.554528 | 0.81849  |
| Trim35    | 103.20212 | 0.091588908  | 0.155039 | 0.590748 | 0.554689 | 0.81849  |
| Scn8a     | 194.97448 | 0.100529932  | 0.170964 | 0.588019 | 0.556519 | 0.819041 |
| Atrn      | 466.81743 | -0.064906645 | 0.110634 | -0.58668 | 0.557419 | 0.819041 |

|          |           |              |          |          |          |          |
|----------|-----------|--------------|----------|----------|----------|----------|
| Tbx21    | 2.7507575 | 0.372799421  | 0.644741 | 0.578216 | 0.563119 | NA       |
| Pcca     | 228.72748 | 0.058195606  | 0.101251 | 0.574765 | 0.56545  | 0.827977 |
| Pmepa1   | 84.964695 | -0.08938097  | 0.155761 | -0.57383 | 0.566081 | 0.827977 |
| Grn      | 1142.1142 | 0.087918646  | 0.153606 | 0.572365 | 0.567075 | 0.827977 |
| Vdac1    | 1539.1138 | -0.040143285 | 0.070684 | -0.56792 | 0.570087 | 0.829343 |
| Ccl2     | 144.1617  | 0.111874822  | 0.197293 | 0.567049 | 0.570681 | 0.829343 |
| Cd3e     | 3.9141075 | 0.312678813  | 0.551942 | 0.566506 | 0.57105  | NA       |
| Prkce    | 230.83143 | 0.056457557  | 0.100006 | 0.564542 | 0.572385 | 0.829343 |
| Il18     | 220.83325 | -0.061653863 | 0.109828 | -0.56136 | 0.574549 | 0.829343 |
| Casp3    | 119.06576 | -0.06776099  | 0.121609 | -0.5572  | 0.577389 | 0.829343 |
| Cd40     | 10.181264 | -0.187016123 | 0.335707 | -0.55708 | 0.577471 | NA       |
| Reck     | 50.857858 | 0.103897946  | 0.187607 | 0.553806 | 0.579712 | 0.829343 |
| Ube4b    | 201.25868 | -0.050769756 | 0.092067 | -0.55144 | 0.581329 | 0.829343 |
| Trim3    | 331.86613 | 0.054751125  | 0.099485 | 0.550343 | 0.582084 | 0.829343 |
| Gas6     | 705.33691 | 0.063648087  | 0.11577  | 0.549782 | 0.582469 | 0.829343 |
| Tpsb2    | 4.3693305 | -0.281084939 | 0.512709 | -0.54824 | 0.58353  | NA       |
| Pdgfra   | 221.30277 | 0.05938663   | 0.108362 | 0.548037 | 0.583666 | 0.829343 |
| Rxfp1    | 12.468182 | 0.171377889  | 0.313171 | 0.547234 | 0.584218 | NA       |
| Atp5b    | 2933.2339 | 0.038828458  | 0.071157 | 0.545677 | 0.585288 | 0.829343 |
| Gsk3b    | 625.86464 | -0.067635756 | 0.124242 | -0.54439 | 0.586175 | 0.829343 |
| Adrb1    | 28.613447 | -0.169980099 | 0.312572 | -0.54381 | 0.586572 | 0.829343 |
| Grb2     | 378.79037 | 0.048415281  | 0.089072 | 0.543552 | 0.58675  | 0.829343 |
| Atp6v0d1 | 1220.1936 | 0.069256346  | 0.127468 | 0.543325 | 0.586906 | 0.829343 |
| Prkci    | 169.63879 | 0.062231479  | 0.114774 | 0.54221  | 0.587674 | 0.829343 |
| Amigo2   | 48.795451 | 0.118979107  | 0.2198   | 0.541306 | 0.588297 | 0.829343 |
| Drd1     | 15.392687 | 0.176734308  | 0.328896 | 0.537355 | 0.591022 | NA       |
| Tmsb4x   | 48491.285 | -0.061847477 | 0.115374 | -0.53606 | 0.591915 | 0.831331 |
| Orc5     | 161.41908 | -0.075567238 | 0.141336 | -0.53467 | 0.592881 | 0.831331 |
| Eomes    | 4.7064735 | 0.266374696  | 0.499676 | 0.533095 | 0.593968 | NA       |
| Tpi1     | 120.36155 | -0.066766873 | 0.125249 | -0.53307 | 0.593983 | 0.831331 |
| Cst7     | 1203.2802 | 0.081786641  | 0.15429  | 0.530085 | 0.596053 | 0.831331 |
| Smad3    | 60.344706 | -0.089491677 | 0.169164 | -0.52902 | 0.596789 | 0.831331 |
| Siglech  | 165.67347 | -0.084521287 | 0.159901 | -0.52858 | 0.597094 | 0.831331 |
| Pdpk1    | 224.03584 | 0.053182874  | 0.100885 | 0.527164 | 0.59808  | 0.831331 |
| Trim46   | 118.59754 | -0.095607719 | 0.181994 | -0.52533 | 0.599351 | 0.831435 |
| Orc4     | 352.0015  | -0.042148596 | 0.081344 | -0.51815 | 0.604351 | 0.835474 |
| Arpc2    | 692.72332 | 0.106350984  | 0.205604 | 0.517262 | 0.604973 | 0.835474 |
| Cdc23    | 200.80966 | -0.052210138 | 0.101398 | -0.5149  | 0.606621 | 0.835474 |
| Mapk8    | 305.91524 | -0.039652238 | 0.077106 | -0.51426 | 0.607071 | 0.835474 |
| Tnf      | 8.4518334 | 0.184678652  | 0.360876 | 0.511751 | 0.608825 | NA       |
| Thrb     | 71.646637 | 0.078166153  | 0.152901 | 0.51122  | 0.609197 | 0.836742 |
| Myo5a    | 718.40705 | -0.047192024 | 0.092729 | -0.50892 | 0.610807 | 0.8373   |
| Lrrc7    | 93.346381 | -0.141267482 | 0.279626 | -0.5052  | 0.613417 | 0.839222 |
| Pgam1    | 1096.1537 | -0.058933235 | 0.117307 | -0.50238 | 0.615398 | 0.840278 |
| Cdk7     | 292.87604 | 0.065620692  | 0.131998 | 0.497133 | 0.619095 | 0.843669 |
| Slc46a1  | 32.752345 | 0.109533982  | 0.221494 | 0.494524 | 0.620936 | 0.844522 |
| Nwd1     | 89.444648 | -0.152723495 | 0.310301 | -0.49218 | 0.622593 | 0.845122 |

|           |           |              |          |          |          |          |
|-----------|-----------|--------------|----------|----------|----------|----------|
| Hpgds     | 159.69213 | -0.087177946 | 0.178281 | -0.48899 | 0.624847 | 0.845548 |
| Cul2      | 340.57513 | 0.070645207  | 0.144677 | 0.488295 | 0.625341 | 0.845548 |
| Atp6v1c1  | 1339.3508 | 0.029723076  | 0.061187 | 0.485777 | 0.627125 | 0.846315 |
| Cd8a      | 5.7871623 | -0.219506808 | 0.457116 | -0.4802  | 0.631086 | NA       |
| B3gnt5    | 8.9275413 | -0.168503295 | 0.353848 | -0.4762  | 0.63393  | NA       |
| Gphn      | 267.02016 | -0.046390519 | 0.098711 | -0.46996 | 0.638382 | 0.859319 |
| C3ar1     | 482.82574 | -0.064890276 | 0.138427 | -0.46877 | 0.639235 | 0.859319 |
| Entpd2    | 72.882917 | -0.077484653 | 0.167378 | -0.46293 | 0.643413 | 0.863266 |
| Hadh      | 284.07723 | 0.068430242  | 0.149835 | 0.456705 | 0.647883 | 0.867445 |
| Pros1     | 472.79715 | 0.051993218  | 0.114241 | 0.455119 | 0.649023 | 0.867445 |
| Hacd2     | 469.82125 | 0.05136745   | 0.115735 | 0.443839 | 0.657159 | 0.871967 |
| Pdhh      | 1044.241  | -0.0403819   | 0.090985 | -0.44383 | 0.657165 | 0.871967 |
| Atp5g3    | 1258.7812 | 0.033388624  | 0.075282 | 0.443511 | 0.657396 | 0.871967 |
| Map2      | 1296.453  | -0.055129267 | 0.124384 | -0.44322 | 0.657608 | 0.871967 |
| Abi2      | 308.20802 | 0.03404764   | 0.077238 | 0.440815 | 0.659347 | 0.871967 |
| Nuak1     | 65.119644 | -0.07435622  | 0.16899  | -0.44    | 0.659935 | 0.871967 |
| Lgmn      | 3410.7863 | 0.052774949  | 0.120746 | 0.437074 | 0.662058 | 0.873112 |
| Stat2     | 112.72922 | -0.07878683  | 0.185094 | -0.42566 | 0.670357 | 0.882382 |
| Fcgrt     | 201.42225 | 0.075120518  | 0.180352 | 0.416521 | 0.677029 | 0.888145 |
| Ms4a4a    | 62.843537 | 0.092981441  | 0.22373  | 0.415596 | 0.677706 | 0.888145 |
| Gabra4    | 57.534439 | -0.065114172 | 0.157122 | -0.41442 | 0.678569 | 0.888145 |
| Tlr4      | 92.991465 | 0.089493872  | 0.219685 | 0.407373 | 0.683734 | 0.893224 |
| Mapk1     | 967.38965 | 0.033931109  | 0.083697 | 0.405405 | 0.68518  | 0.893236 |
| Nlrp3     | 19.871636 | 0.120213454  | 0.298802 | 0.402318 | 0.68745  | 0.893236 |
| Nes       | 215.15667 | 0.049633102  | 0.12343  | 0.402116 | 0.687599 | 0.893236 |
| Gira3     | 72.178764 | -0.075199461 | 0.18836  | -0.39923 | 0.689721 | 0.894322 |
| Mapk14    | 298.11398 | -0.037535996 | 0.095355 | -0.39364 | 0.693843 | 0.897232 |
| Slc17a6   | 240.95282 | -0.042427515 | 0.108043 | -0.39269 | 0.694548 | 0.897232 |
| Ank2      | 1617.7403 | 0.049047407  | 0.126299 | 0.388343 | 0.697762 | 0.899041 |
| Cdc7      | 29.860996 | 0.096292655  | 0.250404 | 0.38455  | 0.700571 | 0.899041 |
| Epb41l2   | 652.44697 | 0.031680394  | 0.082395 | 0.384493 | 0.700613 | 0.899041 |
| Timp2     | 3323.634  | 0.047522473  | 0.123819 | 0.383806 | 0.701122 | 0.899041 |
| Ceacam3   | 4.3926079 | -0.192754811 | 0.506865 | -0.38029 | 0.703732 | NA       |
| Shc3      | 210.77443 | -0.095028383 | 0.250929 | -0.37871 | 0.704906 | 0.901376 |
| Cysltr1   | 33.629599 | 0.082193596  | 0.217526 | 0.377857 | 0.705537 | 0.901376 |
| Gabrg2    | 297.44308 | -0.045474974 | 0.121247 | -0.37506 | 0.707615 | 0.901844 |
| Mafb      | 79.777651 | 0.065533918  | 0.176559 | 0.371174 | 0.710508 | 0.901844 |
| Ywhaz     | 2106.7663 | -0.031052823 | 0.083688 | -0.37106 | 0.710596 | 0.901844 |
| Il1b      | 11.38121  | 0.122126633  | 0.32923  | 0.370946 | 0.710678 | NA       |
| Ap2m1     | 1823.1087 | 0.027870024  | 0.075681 | 0.368258 | 0.712681 | 0.901844 |
| Tnfrsf11a | 63.571391 | 0.055506904  | 0.150759 | 0.368184 | 0.712736 | 0.901844 |
| Lamp2     | 2354.202  | 0.064318353  | 0.175299 | 0.366906 | 0.713689 | 0.901844 |
| Sgce      | 463.60375 | 0.075337317  | 0.208255 | 0.361754 | 0.717536 | 0.903291 |
| Cd84      | 573.26415 | -0.053232972 | 0.14892  | -0.35746 | 0.720747 | 0.903291 |
| Rasgrf1   | 203.80873 | 0.034138798  | 0.09551  | 0.357438 | 0.720764 | 0.903291 |
| Dlx2      | 8.271244  | 0.139535742  | 0.39114  | 0.356741 | 0.721285 | NA       |
| Calm2     | 2043.0813 | -0.031067588 | 0.087238 | -0.35613 | 0.721746 | 0.903291 |

|          |           |              |          |          |          |          |
|----------|-----------|--------------|----------|----------|----------|----------|
| Xpnpep1  | 252.22238 | 0.032834939  | 0.092303 | 0.35573  | 0.722043 | 0.903291 |
| Gzmb     | 5.6408471 | 0.15406034   | 0.434045 | 0.354941 | 0.722634 | NA       |
| Rasa1    | 141.23289 | 0.047659814  | 0.134578 | 0.354143 | 0.723231 | 0.903291 |
| Cacna2d1 | 102.04318 | 0.03962564   | 0.112609 | 0.351886 | 0.724924 | 0.903291 |
| C1qc     | 3517.3163 | -0.059790512 | 0.170113 | -0.35147 | 0.725232 | 0.903291 |
| Lag3     | 156.18991 | 0.056054824  | 0.162356 | 0.345259 | 0.729899 | 0.907478 |
| Klrb1    | 6.7145546 | 0.140667665  | 0.410893 | 0.342347 | 0.73209  | NA       |
| Mad2l1   | 23.059681 | -0.089346559 | 0.262554 | -0.3403  | 0.733632 | 0.909013 |
| Nlk      | 79.582223 | 0.046014645  | 0.135281 | 0.340141 | 0.73375  | 0.909013 |
| C9orf72  | 230.3797  | -0.039521094 | 0.117029 | -0.3377  | 0.735587 | 0.909667 |
| Shank2   | 23.207145 | -0.099464463 | 0.296243 | -0.33575 | 0.737057 | 0.909866 |
| Ube2g1   | 301.52413 | 0.032867011  | 0.098743 | 0.332853 | 0.739245 | 0.910949 |
| Immt     | 648.25244 | 0.02453737   | 0.074579 | 0.329013 | 0.742146 | 0.912592 |
| Dnajc5   | 929.71819 | 0.023446625  | 0.071803 | 0.32654  | 0.744016 | 0.912592 |
| Cnr1     | 163.93961 | -0.036776176 | 0.112853 | -0.32588 | 0.744518 | 0.912592 |
| Grm2     | 13.15262  | 0.097314874  | 0.302188 | 0.322035 | 0.747427 | NA       |
| Ptprc    | 133.91387 | -0.042673707 | 0.132926 | -0.32103 | 0.748184 | 0.913439 |
| Slc10a6  | 7.6457008 | -0.123203578 | 0.38495  | -0.32005 | 0.74893  | NA       |
| Sall1    | 213.00812 | -0.036261939 | 0.113377 | -0.31983 | 0.749094 | 0.913439 |
| Gnb1     | 1586.6882 | 0.021728347  | 0.067952 | 0.319758 | 0.749152 | 0.913439 |
| Acot13   | 549.73831 | 0.026752307  | 0.084644 | 0.316058 | 0.751958 | 0.914931 |
| Gla      | 180.52718 | 0.036352377  | 0.116046 | 0.313258 | 0.754085 | 0.914931 |
| Vdac3    | 1646.8446 | -0.032448509 | 0.103688 | -0.31294 | 0.754324 | 0.914931 |
| Il1a     | 24.357476 | 0.070974084  | 0.228948 | 0.31     | 0.756561 | 0.915141 |
| Ernm     | 2362.067  | 0.03775851   | 0.122097 | 0.309251 | 0.757131 | 0.915141 |
| Sox10    | 410.04751 | -0.034705639 | 0.113267 | -0.3064  | 0.759297 | 0.916165 |
| Fa2h     | 228.96798 | -0.045923692 | 0.151419 | -0.30329 | 0.76167  | 0.917437 |
| Cd4      | 7.3250888 | -0.137434146 | 0.456666 | -0.30095 | 0.763452 | NA       |
| Cux2     | 54.724877 | 0.055375628  | 0.185628 | 0.298315 | 0.765462 | 0.920409 |
| Foxp3    | 3.964922  | 0.155968396  | 0.525104 | 0.297024 | 0.766449 | NA       |
| Tusc3    | 397.48476 | -0.02681011  | 0.091238 | -0.29385 | 0.768875 | 0.921461 |
| Atg5     | 244.36213 | 0.035655614  | 0.121403 | 0.293697 | 0.768989 | 0.921461 |
| C1qb     | 2970.1525 | 0.041976573  | 0.14637  | 0.286784 | 0.774278 | 0.926202 |
| Aif1     | 762.25466 | -0.039343975 | 0.140265 | -0.2805  | 0.779096 | 0.929185 |
| Nmnat2   | 464.22378 | -0.060889025 | 0.217429 | -0.28004 | 0.779446 | 0.929185 |
| Cyfp2    | 939.84673 | 0.028597296  | 0.103726 | 0.275701 | 0.782777 | 0.93069  |
| Cdc42    | 3958.9934 | 0.022922087  | 0.083381 | 0.274908 | 0.783387 | 0.93069  |
| Cacna1e  | 64.764426 | -0.064815342 | 0.241846 | -0.268   | 0.788697 | 0.9354   |
| Plaa     | 132.8834  | -0.035282267 | 0.133478 | -0.26433 | 0.791526 | 0.936624 |
| Rnasel   | 62.542146 | -0.045558279 | 0.173118 | -0.26316 | 0.792424 | 0.936624 |
| Gria4    | 438.53207 | 0.026284729  | 0.100945 | 0.260387 | 0.794566 | 0.93756  |
| Arl6ip5  | 733.42367 | 0.028210448  | 0.109468 | 0.257705 | 0.796635 | 0.938409 |
| Csf1     | 620.93519 | 0.028050349  | 0.113458 | 0.247231 | 0.804729 | 0.940245 |
| Kcnd1    | 30.02245  | -0.061366658 | 0.248531 | -0.24692 | 0.804972 | 0.940245 |
| Map3k4   | 124.74483 | -0.029872167 | 0.121672 | -0.24551 | 0.806059 | 0.940245 |
| Ppm1l    | 143.37157 | -0.027169221 | 0.110967 | -0.24484 | 0.80658  | 0.940245 |
| Hacd3    | 531.52776 | 0.02917677   | 0.120146 | 0.242845 | 0.808125 | 0.940245 |



|          |           |              |          |          |          |          |
|----------|-----------|--------------|----------|----------|----------|----------|
| Serpini1 | 449.37186 | -0.032763674 | 0.137401 | -0.23845 | 0.81153  | 0.940245 |
| Trim17   | 26.280752 | 0.084271456  | 0.356832 | 0.236166 | 0.813304 | 0.940245 |
| Ctsd     | 33373.344 | -0.044892408 | 0.190837 | -0.23524 | 0.814023 | 0.940245 |
| Rtn4     | 2414.7838 | -0.025579437 | 0.109272 | -0.23409 | 0.814915 | 0.940245 |
| Dock3    | 321.42426 | 0.038281496  | 0.164539 | 0.232659 | 0.816027 | 0.940245 |
| Slc25a4  | 5283.5359 | 0.028938002  | 0.124464 | 0.232501 | 0.816149 | 0.940245 |
| Ccr5     | 113.87532 | 0.036318506  | 0.156609 | 0.231905 | 0.816612 | 0.940245 |
| Slco2b1  | 36.665288 | -0.049205942 | 0.2134   | -0.23058 | 0.81764  | 0.940245 |
| Pik3r1   | 675.42084 | 0.017114811  | 0.074263 | 0.230461 | 0.817734 | 0.940245 |
| Mapk10   | 1043.1395 | 0.017764409  | 0.077407 | 0.229492 | 0.818486 | 0.940245 |
| Ggta1    | 105.87415 | 0.032737376  | 0.15228  | 0.214981 | 0.829782 | 0.947859 |
| Cul1     | 753.55154 | -0.018317197 | 0.085486 | -0.21427 | 0.830335 | 0.947859 |
| Mki67    | 50.103958 | -0.037235487 | 0.173992 | -0.21401 | 0.830542 | 0.947859 |
| P2ry14   | 27.964678 | -0.043797179 | 0.206703 | -0.21188 | 0.832197 | 0.947859 |
| Cd34     | 756.55184 | -0.032949155 | 0.158383 | -0.20803 | 0.835202 | 0.947859 |
| Glul     | 7290.39   | 0.023782173  | 0.115116 | 0.206594 | 0.836327 | 0.947859 |
| Il10ra   | 60.920564 | 0.038476618  | 0.186256 | 0.206579 | 0.836339 | 0.947859 |
| Trat1    | 6.6182047 | 0.089217041  | 0.432438 | 0.206312 | 0.836547 | NA       |
| Anapc1   | 335.00706 | 0.018306316  | 0.088754 | 0.206258 | 0.836589 | 0.947859 |
| Fgf13    | 268.12026 | -0.033632324 | 0.163873 | -0.20523 | 0.837389 | 0.947859 |
| Atp2b2   | 754.04746 | -0.042246464 | 0.20985  | -0.20132 | 0.840451 | 0.949778 |
| Pth2r    | 6.6278176 | 0.0850777    | 0.424267 | 0.200529 | 0.841067 | NA       |
| E2f3     | 96.94407  | -0.031112485 | 0.156415 | -0.19891 | 0.842333 | 0.950141 |
| Trim37   | 859.48813 | -0.018463924 | 0.09353  | -0.19741 | 0.843506 | 0.950141 |
| Ms4a2    | 6.6290822 | -0.080907649 | 0.412994 | -0.19591 | 0.844684 | NA       |
| Jun      | 359.90829 | -0.024896129 | 0.127489 | -0.19528 | 0.845173 | 0.950478 |
| Map2k4   | 569.16055 | 0.019902722  | 0.103926 | 0.191508 | 0.848128 | 0.95226  |
| Nckap1   | 1436.6721 | -0.017544624 | 0.094552 | -0.18556 | 0.852793 | 0.955954 |
| Ugt8a    | 655.84655 | -0.030673069 | 0.168438 | -0.1821  | 0.855502 | 0.957446 |
| Ngf      | 15.761134 | 0.054330737  | 0.301353 | 0.180289 | 0.856925 | NA       |
| Axl      | 795.22894 | -0.023689502 | 0.135878 | -0.17434 | 0.861595 | 0.960604 |
| Tiam1    | 65.865102 | -0.031075064 | 0.181466 | -0.17124 | 0.864031 | 0.960604 |
| Asb10    | 15.032871 | -0.049509186 | 0.293781 | -0.16852 | 0.866171 | NA       |
| Pgk1     | 4381.6827 | 0.013398108  | 0.079809 | 0.167877 | 0.86668  | 0.960604 |
| Adgrl4   | 87.282994 | 0.02761      | 0.165436 | 0.166893 | 0.867455 | 0.960604 |
| Acadm    | 338.87756 | 0.029285532  | 0.176809 | 0.165633 | 0.868446 | 0.960604 |
| Anapc7   | 22.490853 | 0.037861166  | 0.229025 | 0.165314 | 0.868697 | 0.960604 |
| Cd163    | 44.58807  | 0.050984806  | 0.308775 | 0.165119 | 0.86885  | 0.960604 |
| Cables1  | 121.06994 | 0.019926502  | 0.121175 | 0.164444 | 0.869381 | 0.960604 |
| Gas7     | 293.27242 | 0.016987826  | 0.10443  | 0.162671 | 0.870777 | 0.960619 |
| Camk4    | 58.405443 | -0.027466956 | 0.173249 | -0.15854 | 0.874031 | 0.960757 |
| Kcnk13   | 91.557913 | -0.025362865 | 0.160778 | -0.15775 | 0.874653 | 0.960757 |
| Clcf1    | 23.812423 | -0.035053491 | 0.223346 | -0.15695 | 0.875286 | 0.960757 |
| Atp6v1h  | 1772.192  | 0.019542605  | 0.127695 | 0.153041 | 0.878366 | 0.960757 |
| Mtmt4    | 162.67824 | 0.017095241  | 0.111718 | 0.153022 | 0.878381 | 0.960757 |
| Ptk2     | 207.94065 | 0.016841893  | 0.11081  | 0.151988 | 0.879196 | 0.960757 |
| Cdc27    | 258.11083 | 0.015098588  | 0.102293 | 0.147601 | 0.882658 | 0.961941 |

|           |           |              |          |          |          |          |
|-----------|-----------|--------------|----------|----------|----------|----------|
| Pkd2      | 167.6339  | 0.015866398  | 0.107856 | 0.147107 | 0.883048 | 0.961941 |
| Sall3     | 65.765663 | 0.031921362  | 0.221621 | 0.144036 | 0.885472 | 0.963072 |
| Ms4a1     | 5.8310065 | 0.063618227  | 0.446346 | 0.142531 | 0.886661 | NA       |
| Cd6       | 12.189256 | 0.045323481  | 0.318446 | 0.142327 | 0.886822 | NA       |
| Abcc8     | 20.759258 | 0.057793195  | 0.407436 | 0.141846 | 0.887202 | 0.963446 |
| Fabp5     | 340.66636 | -0.014138458 | 0.102737 | -0.13762 | 0.890543 | 0.963945 |
| Txn1      | 2127.2025 | -0.025131078 | 0.188148 | -0.13357 | 0.893742 | 0.963945 |
| Grm7      | 191.88212 | -0.027438787 | 0.205977 | -0.13321 | 0.894025 | 0.963945 |
| Prkar1a   | 2255.1982 | -0.007966248 | 0.05995  | -0.13288 | 0.894287 | 0.963945 |
| Bace1     | 248.07341 | 0.012290338  | 0.092764 | 0.13249  | 0.894597 | 0.963945 |
| Asns      | 253.82379 | 0.013567057  | 0.1056   | 0.128476 | 0.897772 | 0.965483 |
| Ccnh      | 585.20175 | 0.008979254  | 0.070606 | 0.127174 | 0.898802 | 0.965483 |
| Cfi       | 5.8174736 | -0.054424287 | 0.429398 | -0.12675 | 0.899142 | NA       |
| Il6       | 6.2536367 | -0.056747036 | 0.449551 | -0.12623 | 0.899549 | NA       |
| Sod1      | 2280.3411 | 0.01657747   | 0.132769 | 0.12486  | 0.900635 | 0.965959 |
| Cxcl15    | 6.1734475 | 0.050915705  | 0.419354 | 0.121415 | 0.903363 | NA       |
| Rtn1      | 943.02622 | 0.014987749  | 0.127747 | 0.117324 | 0.906604 | 0.970862 |
| Chrm2     | 109.54754 | 0.017702906  | 0.158212 | 0.111894 | 0.910908 | 0.9725   |
| Atp6v1e1  | 1217.0567 | -0.013573208 | 0.122735 | -0.11059 | 0.911942 | 0.9725   |
| Lamtor3   | 454.61765 | 0.013602606  | 0.123549 | 0.110099 | 0.912331 | 0.9725   |
| Cyp2u1    | 76.197446 | 0.015313197  | 0.147995 | 0.103471 | 0.917589 | 0.974779 |
| Tgfb1     | 300.48997 | 0.011827327  | 0.114854 | 0.102977 | 0.917981 | 0.974779 |
| App       | 6358.5237 | 0.009565614  | 0.093688 | 0.102101 | 0.918677 | 0.974779 |
| Meaf6     | 213.82615 | 0.010004589  | 0.102449 | 0.097655 | 0.922207 | 0.976257 |
| Prkcq     | 75.719874 | 0.014260228  | 0.149441 | 0.095424 | 0.923978 | 0.976257 |
| Stxbp1    | 1054.4802 | 0.008786297  | 0.098165 | 0.089505 | 0.92868  | 0.976257 |
| Slc25a17  | 232.05722 | 0.011816784  | 0.133376 | 0.088598 | 0.929402 | 0.976257 |
| Gpr34     | 309.64986 | -0.019533948 | 0.228441 | -0.08551 | 0.931856 | 0.976257 |
| Serpine2  | 2694.6591 | 0.011959587  | 0.140119 | 0.085353 | 0.931981 | 0.976257 |
| Il4       | 7.8869441 | 0.031740013  | 0.378382 | 0.083883 | 0.933149 | NA       |
| Plxdc2    | 673.16485 | -0.00975268  | 0.118055 | -0.08261 | 0.934161 | 0.976257 |
| Adcyap1r1 | 546.85604 | 0.009454444  | 0.114626 | 0.082481 | 0.934265 | 0.976257 |
| Rab6b     | 1172.3062 | 0.007176695  | 0.087661 | 0.081869 | 0.934751 | 0.976257 |
| Srpr      | 469.73623 | -0.009395516 | 0.116334 | -0.08076 | 0.93563  | 0.976257 |
| Ptpn1     | 248.78155 | -0.010431033 | 0.131317 | -0.07943 | 0.936687 | 0.976257 |
| Mkrn1     | 567.04727 | 0.006231898  | 0.078751 | 0.079134 | 0.936926 | 0.976257 |
| B4galt6   | 392.56633 | 0.008115322  | 0.10669  | 0.076065 | 0.939368 | 0.976795 |
| Gzma      | 7.9698804 | 0.030653432  | 0.415773 | 0.073726 | 0.941228 | NA       |
| Gpm6a     | 2720.1071 | 0.007503585  | 0.102242 | 0.073391 | 0.941495 | 0.976795 |
| C4a/b     | 2281.6295 | 0.009641013  | 0.133028 | 0.072474 | 0.942225 | 0.976795 |
| Prkab1    | 107.81487 | -0.011420395 | 0.159907 | -0.07142 | 0.943064 | 0.976795 |
| Syn1      | 826.94174 | 0.010697971  | 0.15399  | 0.069472 | 0.944614 | 0.976945 |
| Got1      | 1375.2083 | -0.006129322 | 0.095607 | -0.06411 | 0.948883 | 0.977242 |
| Braf      | 210.05068 | 0.009239331  | 0.148316 | 0.062295 | 0.950328 | 0.977242 |
| Cx3cr1    | 418.47557 | -0.006407605 | 0.10575  | -0.06059 | 0.951684 | 0.977242 |
| Dync1li1  | 108.51668 | 0.007420185  | 0.12285  | 0.060401 | 0.951837 | 0.977242 |
| Srgn      | 440.90363 | 0.007063444  | 0.117903 | 0.059909 | 0.952228 | 0.977242 |

|         |           |              |          |          |          |          |
|---------|-----------|--------------|----------|----------|----------|----------|
| Lair1   | 66.522335 | 0.011768688  | 0.201121 | 0.058516 | 0.953338 | 0.977242 |
| S100a10 | 2109.7294 | -0.007124754 | 0.125559 | -0.05674 | 0.954749 | 0.977247 |
| Spib    | 8.1523556 | 0.021319034  | 0.420593 | 0.050688 | 0.959574 | NA       |
| Tmem119 | 35.033241 | -0.010705447 | 0.22882  | -0.04679 | 0.962684 | 0.98392  |
| Ctsw    | 8.2313086 | -0.018320706 | 0.409173 | -0.04478 | 0.964287 | NA       |
| Myct1   | 18.497495 | 0.012433505  | 0.277713 | 0.044771 | 0.96429  | 0.984114 |
| Cpa3    | 6.744392  | 0.018895699  | 0.428936 | 0.044052 | 0.964863 | NA       |
| Cntnap1 | 214.21161 | -0.006133918 | 0.144627 | -0.04241 | 0.96617  | 0.984587 |
| Map2k1  | 887.2141  | -0.005389717 | 0.134063 | -0.0402  | 0.967931 | 0.984938 |
| Blk     | 6.1149754 | -0.016804953 | 0.472958 | -0.03553 | 0.971656 | NA       |
| Cd8b1   | 6.8690001 | -0.013230193 | 0.416686 | -0.03175 | 0.974671 | NA       |
| Adamts1 | 174.74189 | -0.003136984 | 0.113083 | -0.02774 | 0.977869 | 0.992975 |
| Btrc    | 281.36148 | 0.004771599  | 0.178612 | 0.026715 | 0.978687 | 0.992975 |
| Calm3   | 3056.3168 | -0.003103315 | 0.134582 | -0.02306 | 0.981603 | 0.994482 |
| Hcn1    | 167.03455 | -0.001849479 | 0.132252 | -0.01398 | 0.988842 | 0.996775 |
| Emcn    | 47.110918 | 0.002570422  | 0.185896 | 0.013827 | 0.988968 | 0.996775 |
| Arpc1a  | 1076.75   | 0.001212544  | 0.100735 | 0.012037 | 0.990396 | 0.996775 |
| Lrrc25  | 18.238868 | 0.003125998  | 0.261644 | 0.011948 | 0.990467 | 0.996775 |
| Arg2    | 9.9303458 | 0.003607697  | 0.372376 | 0.009688 | 0.99227  | NA       |
| Slc12a2 | 858.3105  | 0.001561853  | 0.175358 | 0.008907 | 0.992894 | 0.996775 |
| Csf1r   | 898.80693 | -0.000825853 | 0.099572 | -0.00829 | 0.993382 | 0.996775 |
| Slc9a6  | 865.51832 | -0.001478244 | 0.193575 | -0.00764 | 0.993907 | 0.996775 |
| Ctsb    | 6332.0072 | 0.001358847  | 0.234733 | 0.005789 | 0.995381 | 0.996815 |
| Tlr7    | 59.414304 | -0.000610468 | 0.208851 | -0.00292 | 0.997668 | 0.997668 |

Supplementary Table S4. Differential gene expression list of prodromal stage  $\alpha$ -Syn PFF seeded Mhcll<sup>-/-</sup> vs Mhcll<sup>+/+</sup> mice. baseMean, mean transcript levels across all samples; log2FoldChange, log of fold change of RNA; lfcSE, standard error of log of fold change; stat, Wald statistics; padj, p value adjusted for multiple comparison.

|          | baseMean  | log2FoldChange | lfcSE    | stat     | pvalue   | padj     |
|----------|-----------|----------------|----------|----------|----------|----------|
| Trim26   | 135.2848  | 1.391395139    | 0.106641 | 13.04743 | 6.57E-39 | 4.67E-36 |
| Mog      | 2847.1427 | 0.961780076    | 0.100196 | 9.598993 | 8.07E-22 | 2.87E-19 |
| Mmut     | 466.05362 | -0.550865917   | 0.087085 | -6.32563 | 2.52E-10 | 5.97E-08 |
| Ptpn11   | 848.14013 | 0.276545573    | 0.047774 | 5.788666 | 7.09E-09 | 1.26E-06 |
| Hsp90ab1 | 3132.9353 | 0.503154043    | 0.105245 | 4.780784 | 1.75E-06 | 0.000248 |
| Ywhaq    | 4763.8848 | -0.343132831   | 0.073909 | -4.64266 | 3.44E-06 | 0.000407 |
| Cd47     | 548.01424 | 0.35066552     | 0.077495 | 4.525003 | 6.04E-06 | 0.000613 |
| Acat2    | 430.60693 | -0.327045236   | 0.076529 | -4.27349 | 1.92E-05 | 0.001708 |
| Gal3st1  | 220.52337 | -0.574816242   | 0.13985  | -4.11023 | 3.95E-05 | 0.002005 |
| Gnai1    | 1114.7661 | 0.221804409    | 0.053937 | 4.112267 | 3.92E-05 | 0.002005 |
| Ifit3    | 295.26495 | 0.639889391    | 0.15541  | 4.11742  | 3.83E-05 | 0.002005 |
| Ndufb5   | 964.21463 | -0.431465232   | 0.103437 | -4.1713  | 3.03E-05 | 0.002005 |
| Pdha1    | 895.02342 | -0.279473576   | 0.067114 | -4.16418 | 3.12E-05 | 0.002005 |
| Tlr3     | 99.508047 | -0.666945777   | 0.158929 | -4.19651 | 2.71E-05 | 0.002005 |
| Kpna1    | 545.93047 | -0.249454831   | 0.061997 | -4.02368 | 5.73E-05 | 0.002542 |
| Rhob     | 210.94125 | -0.359880252   | 0.089114 | -4.03845 | 5.38E-05 | 0.002542 |
| H2-D1    | 196.86521 | 3.194902692    | 0.798076 | 4.003258 | 6.25E-05 | 0.002609 |
| Nefl     | 1816.5252 | -0.269616407   | 0.068804 | -3.91859 | 8.91E-05 | 0.003513 |
| Por      | 206.4166  | 0.413488399    | 0.107077 | 3.861593 | 0.000113 | 0.00421  |
| Abcb1a   | 324.32568 | 0.549459301    | 0.145429 | 3.778186 | 0.000158 | 0.005608 |
| Atp1b1   | 3803.9302 | -0.300478799   | 0.081066 | -3.70659 | 0.00021  | 0.005966 |
| Atp5pb   | 2122.1659 | -0.336682774   | 0.0903   | -3.72847 | 0.000193 | 0.005966 |
| Pgam1    | 1461.2675 | -0.202733952   | 0.054399 | -3.7268  | 0.000194 | 0.005966 |
| Pkd2     | 175.05778 | 0.444673017    | 0.118667 | 3.747236 | 0.000179 | 0.005966 |
| Ubqln1   | 1019.1859 | 0.246185753    | 0.066316 | 3.712294 | 0.000205 | 0.005966 |
| Phyh     | 798.92311 | 0.186430436    | 0.050665 | 3.679694 | 0.000234 | 0.006377 |
| Atp6v1g2 | 637.59773 | 0.31742528     | 0.087002 | 3.648465 | 0.000264 | 0.006459 |
| Clec7a   | 26.107458 | 1.087343386    | 0.296698 | 3.664809 | 0.000248 | 0.006459 |
| Olfml3   | 95.59177  | 0.670097654    | 0.1833   | 3.655743 | 0.000256 | 0.006459 |
| Syt4     | 932.59237 | -0.249795302   | 0.068826 | -3.62938 | 0.000284 | 0.006724 |
| Ppp3r1   | 2683.4329 | 0.172608563    | 0.049236 | 3.505751 | 0.000455 | 0.010428 |
| Abca1    | 262.01745 | 0.403300955    | 0.115524 | 3.491054 | 0.000481 | 0.010675 |
| Lgals3   | 135.53315 | 1.239819871    | 0.358831 | 3.455164 | 0.00055  | 0.011832 |
| Sec23a   | 777.46027 | -0.20771643    | 0.060412 | -3.43831 | 0.000585 | 0.012224 |
| Stat1    | 137.90057 | 0.385176329    | 0.11244  | 3.42561  | 0.000613 | 0.012444 |
| Fcgrt    | 207.05144 | 0.574423509    | 0.170395 | 3.37113  | 0.000749 | 0.014118 |
| Syng1    | 330.8947  | -0.324931123   | 0.09646  | -3.36856 | 0.000756 | 0.014118 |
| Vegfa    | 410.08029 | -0.384318905   | 0.114061 | -3.36943 | 0.000753 | 0.014118 |
| Btrc     | 365.77348 | 0.216304426    | 0.064662 | 3.345144 | 0.000822 | 0.014242 |
| C4a/b    | 405.13742 | 0.548131093    | 0.163582 | 3.350796 | 0.000806 | 0.014242 |

|           |           |              |          |          |          |          |
|-----------|-----------|--------------|----------|----------|----------|----------|
| Gria1     | 306.1003  | -0.358319904 | 0.106742 | -3.35687 | 0.000788 | 0.014242 |
| Lyz2      | 224.97731 | 0.772299287  | 0.232069 | 3.327889 | 0.000875 | 0.014793 |
| Pros1     | 166.54738 | 0.3649637    | 0.110239 | 3.310662 | 0.000931 | 0.015368 |
| Bhlhe41   | 380.86656 | 0.252109344  | 0.076625 | 3.290175 | 0.001001 | 0.016157 |
| Ccl12     | 40.40324  | 0.693194288  | 0.21298  | 3.254743 | 0.001135 | 0.016762 |
| Gabrg2    | 588.4925  | -0.292592947 | 0.090048 | -3.24932 | 0.001157 | 0.016762 |
| Gng3      | 3556.9006 | -0.175438281 | 0.053861 | -3.25726 | 0.001125 | 0.016762 |
| Tlr2      | 30.564475 | 0.666300383  | 0.20419  | 3.26314  | 0.001102 | 0.016762 |
| Tspo      | 48.425332 | 0.669733854  | 0.205508 | 3.258923 | 0.001118 | 0.016762 |
| Eif2ak1   | 267.44693 | 0.309564323  | 0.096546 | 3.206407 | 0.001344 | 0.017354 |
| Map2k4    | 931.71592 | -0.181107505 | 0.056484 | -3.20635 | 0.001344 | 0.017354 |
| Pdgfra    | 175.54295 | 0.49442993   | 0.153883 | 3.213033 | 0.001313 | 0.017354 |
| Plip      | 304.40488 | -0.272425382 | 0.08485  | -3.21067 | 0.001324 | 0.017354 |
| Serpini1  | 833.08977 | -0.250031896 | 0.077631 | -3.22076 | 0.001278 | 0.017354 |
| Wdr35     | 183.81721 | -0.285237923 | 0.08826  | -3.23178 | 0.00123  | 0.017354 |
| Gsn       | 2196.3538 | 0.758490635  | 0.238641 | 3.178374 | 0.001481 | 0.018777 |
| Ptprz1    | 904.87646 | -0.327049392 | 0.104818 | -3.12018 | 0.001807 | 0.022513 |
| Gabra3    | 578.87249 | -0.300019597 | 0.096919 | -3.09556 | 0.001964 | 0.024047 |
| Slc6a1    | 1045.3188 | -0.236514749 | 0.077009 | -3.07128 | 0.002131 | 0.025222 |
| Trim37    | 1549.7873 | -0.234816975 | 0.076381 | -3.07428 | 0.00211  | 0.025222 |
| Gnb1      | 2194.9711 | -0.126714403 | 0.04147  | -3.05559 | 0.002246 | 0.025314 |
| Mktn1     | 815.6471  | -0.17263674  | 0.056486 | -3.05625 | 0.002241 | 0.025314 |
| Vim       | 1101.2022 | 0.585702848  | 0.191575 | 3.057296 | 0.002233 | 0.025314 |
| Epb41l2   | 484.04379 | 0.207945404  | 0.068646 | 3.029225 | 0.002452 | 0.026974 |
| Ptgis     | 76.105696 | 0.787662751  | 0.260207 | 3.027058 | 0.002469 | 0.026974 |
| Grk3      | 175.37765 | -0.268505764 | 0.089018 | -3.0163  | 0.002559 | 0.027527 |
| Ank2      | 1867.5257 | 0.331006607  | 0.110537 | 2.994523 | 0.002749 | 0.027836 |
| Atp5b     | 4297.5644 | -0.209027181 | 0.06956  | -3.00498 | 0.002656 | 0.027836 |
| Fabp5     | 220.80105 | -0.318324505 | 0.106439 | -2.99067 | 0.002784 | 0.027836 |
| Il34      | 165.59851 | 0.514122417  | 0.171452 | 2.998643 | 0.002712 | 0.027836 |
| Pde1a     | 199.05232 | 0.462378257  | 0.154298 | 2.99666  | 0.00273  | 0.027836 |
| Rfx4      | 110.02134 | -0.464635531 | 0.155678 | -2.9846  | 0.00284  | 0.028001 |
| Ccl6      | 37.235432 | 0.839678436  | 0.283002 | 2.967037 | 0.003007 | 0.028849 |
| Ugt8a     | 1117.062  | -0.308145076 | 0.10381  | -2.96836 | 0.002994 | 0.028849 |
| Hacd3     | 636.35436 | 0.184410857  | 0.063121 | 2.92155  | 0.003483 | 0.032538 |
| Lpl       | 37.932436 | 0.542890956  | 0.18567  | 2.923963 | 0.003456 | 0.032538 |
| Acs13     | 1627.3144 | -0.233535817 | 0.080599 | -2.8975  | 0.003762 | 0.033002 |
| Gprasp1   | 1481.3259 | -0.216795705 | 0.074763 | -2.89979 | 0.003734 | 0.033002 |
| Nrg1      | 337.53984 | -0.273416118 | 0.093872 | -2.91265 | 0.003584 | 0.033002 |
| P2ry12    | 240.22756 | -0.468836415 | 0.161824 | -2.8972  | 0.003765 | 0.033002 |
| Psmb8     | 62.66405  | 0.571657297  | 0.196941 | 2.902687 | 0.0037   | 0.033002 |
| Lilrb4a   | 24.301745 | 0.76193698   | 0.263382 | 2.892893 | 0.003817 | 0.033051 |
| Lamtor3   | 547.24987 | -0.185545031 | 0.064402 | -2.88106 | 0.003963 | 0.033904 |
| Psma5     | 893.74978 | -0.229470273 | 0.079809 | -2.87523 | 0.004037 | 0.034125 |
| Tln2      | 263.68424 | 0.412508176  | 0.143721 | 2.8702   | 0.004102 | 0.034265 |
| Skp1a     | 2476.0575 | -0.191714011 | 0.067214 | -2.85231 | 0.00434  | 0.035832 |
| Ube2d2a/l | 714.96026 | 0.175291618  | 0.061647 | 2.843462 | 0.004463 | 0.036044 |

|         |           |              |          |          |          |          |
|---------|-----------|--------------|----------|----------|----------|----------|
| Ube3c   | 282.93088 | -0.266251871 | 0.093648 | -2.84312 | 0.004467 | 0.036044 |
| Cd74    | 277.36424 | 1.136610972  | 0.401056 | 2.834048 | 0.004596 | 0.036667 |
| Cnp     | 7982.7306 | -0.258382281 | 0.092255 | -2.80073 | 0.005099 | 0.039781 |
| Mbp     | 13540.445 | -0.33798953  | 0.120552 | -2.80367 | 0.005052 | 0.039781 |
| Adcy1   | 238.20363 | -0.316605034 | 0.113398 | -2.79197 | 0.005239 | 0.04043  |
| E2f3    | 106.10042 | -0.302057366 | 0.108559 | -2.78243 | 0.005395 | 0.04119  |
| Gjb1    | 457.73409 | -0.314208624 | 0.114183 | -2.7518  | 0.005927 | 0.044766 |
| Dlgap1  | 75.939182 | 0.448842341  | 0.164163 | 2.734125 | 0.006255 | 0.046309 |
| Prkacb  | 201.74759 | 0.266384401  | 0.097442 | 2.73376  | 0.006262 | 0.046309 |
| Klk6    | 2062.6104 | -0.314597397 | 0.1159   | -2.71439 | 0.00664  | 0.048105 |
| Sox10   | 459.38799 | -0.292634345 | 0.107784 | -2.71502 | 0.006627 | 0.048105 |
| Mapk10  | 1834.3147 | -0.14004828  | 0.051814 | -2.70288 | 0.006874 | 0.049299 |
| Iigp1   | 45.42719  | 0.808337924  | 0.300986 | 2.685631 | 0.007239 | 0.05089  |
| Kcnk13  | 117.20858 | -0.318259229 | 0.118386 | -2.68831 | 0.007181 | 0.05089  |
| Atp5g3  | 1932.0149 | -0.137338146 | 0.051542 | -2.66456 | 0.007709 | 0.052396 |
| Cd34    | 310.84538 | 0.529187447  | 0.198731 | 2.66283  | 0.007749 | 0.052396 |
| Slc9a6  | 1363.988  | -0.130439037 | 0.048954 | -2.66454 | 0.007709 | 0.052396 |
| Vdac3   | 2471.5943 | -0.249809753 | 0.093527 | -2.67099 | 0.007563 | 0.052396 |
| Reck    | 63.460223 | 0.652419662  | 0.245525 | 2.657239 | 0.007878 | 0.05277  |
| Samm50  | 550.37979 | -0.184309229 | 0.069662 | -2.64578 | 0.00815  | 0.054081 |
| Gbp2    | 30.813475 | 0.654027684  | 0.249551 | 2.620814 | 0.008772 | 0.057139 |
| Sqstm1  | 1783.7286 | 0.160439049  | 0.061213 | 2.620979 | 0.008768 | 0.057139 |
| Emp1    | 110.43683 | 0.731339684  | 0.279676 | 2.61495  | 0.008924 | 0.057273 |
| Igfbp5  | 332.73685 | 1.129831535  | 0.432762 | 2.610743 | 0.009035 | 0.057273 |
| Nes     | 79.137616 | 0.431715227  | 0.165351 | 2.610905 | 0.00903  | 0.057273 |
| Pak1    | 1757.3826 | -0.226426958 | 0.088123 | -2.56943 | 0.010187 | 0.064004 |
| Gpr17   | 72.42369  | -0.407916837 | 0.159909 | -2.55092 | 0.010744 | 0.066913 |
| Zpr1    | 139.8407  | -0.287235451 | 0.113069 | -2.54037 | 0.011074 | 0.068368 |
| Pdhh    | 1565.4038 | -0.189169748 | 0.074686 | -2.53288 | 0.011313 | 0.069242 |
| Pias1   | 130.94332 | -0.304989814 | 0.121902 | -2.50193 | 0.012352 | 0.074956 |
| Amigo2  | 70.374811 | 0.394594228  | 0.159787 | 2.469503 | 0.01353  | 0.080726 |
| Icam2   | 37.337625 | 0.432850221  | 0.175188 | 2.470781 | 0.013482 | 0.080726 |
| Bhlhe40 | 551.6933  | 0.141825784  | 0.057824 | 2.452701 | 0.014179 | 0.08282  |
| Fos     | 34.933714 | -0.621461702 | 0.253515 | -2.45138 | 0.014231 | 0.08282  |
| Pecam1  | 104.03817 | 0.293421277  | 0.119545 | 2.454488 | 0.014109 | 0.08282  |
| Ptgs2   | 11.346207 | 0.957460705  | 0.393012 | 2.436213 | 0.014842 | 0.085673 |
| Csnk2a1 | 969.40671 | 0.167596805  | 0.069022 | 2.42818  | 0.015175 | 0.086888 |
| Stat3   | 405.11246 | 0.400579773  | 0.166202 | 2.410197 | 0.015944 | 0.090561 |
| Glrh    | 3153.0227 | -0.166586404 | 0.069233 | -2.40616 | 0.016121 | 0.090842 |
| Acat1   | 968.85297 | -0.21628329  | 0.090455 | -2.39106 | 0.0168   | 0.092281 |
| Grn     | 197.22612 | 0.294875305  | 0.123579 | 2.386134 | 0.017027 | 0.092281 |
| Islr2   | 16.902434 | 1.043062455  | 0.435372 | 2.395796 | 0.016584 | 0.092281 |
| Plp1    | 47387.289 | -0.229353476 | 0.096101 | -2.38658 | 0.017006 | 0.092281 |
| Sirpa   | 282.43444 | 0.222668542  | 0.093292 | 2.386793 | 0.016996 | 0.092281 |
| Aldh1a1 | 729.05879 | 0.236535332  | 0.099942 | 2.366732 | 0.017946 | 0.096527 |
| Olig1   | 169.68507 | -0.294255762 | 0.124707 | -2.35958 | 0.018296 | 0.097669 |
| Pgk1    | 4876.3825 | -0.156141634 | 0.066436 | -2.35026 | 0.01876  | 0.099402 |

|          |           |              |          |          |          |          |
|----------|-----------|--------------|----------|----------|----------|----------|
| Nkiras1  | 824.98475 | -0.197949159 | 0.084542 | -2.34142 | 0.019211 | 0.101034 |
| CltA     | 2189.2402 | 0.12506469   | 0.053588 | 2.333802 | 0.019606 | 0.102355 |
| Atg12    | 413.41656 | -0.145757863 | 0.062546 | -2.33041 | 0.019785 | 0.102533 |
| Nuak1    | 64.811932 | -0.310788097 | 0.134221 | -2.3155  | 0.020586 | 0.105911 |
| Egfr     | 54.70631  | 0.392414618  | 0.169936 | 2.309188 | 0.020933 | 0.106925 |
| Adamts1  | 143.24641 | 0.579380299  | 0.25141  | 2.304522 | 0.021193 | 0.107481 |
| Serinc3  | 1290.2937 | 0.144416639  | 0.062791 | 2.299961 | 0.02145  | 0.108013 |
| Aqp4     | 1973.6101 | -0.220954802 | 0.096267 | -2.29524 | 0.021719 | 0.108597 |
| Adgra2   | 60.411356 | 0.605182292  | 0.264601 | 2.28715  | 0.022187 | 0.108635 |
| Adora2b  | 102.28842 | -0.357253615 | 0.156378 | -2.28455 | 0.022339 | 0.108635 |
| Eno2     | 1270.6751 | -0.204908375 | 0.089543 | -2.28838 | 0.022115 | 0.108635 |
| Hexb     | 1318.8592 | 0.177964874  | 0.077726 | 2.289637 | 0.022042 | 0.108635 |
| Timp2    | 2570.9845 | 0.216766879  | 0.095249 | 2.275782 | 0.022859 | 0.109819 |
| Lars     | 239.42901 | -0.184510429 | 0.081095 | -2.27524 | 0.022892 | 0.109819 |
| Aars     | 328.89192 | -0.184094799 | 0.081978 | -2.24567 | 0.024725 | 0.117817 |
| Ncam2    | 627.85781 | -0.150630369 | 0.067301 | -2.23816 | 0.025211 | 0.11933  |
| Rab6b    | 2106.5156 | -0.11964888  | 0.053711 | -2.22762 | 0.025906 | 0.121007 |
| Syt13    | 93.422344 | -0.270180537 | 0.121181 | -2.22957 | 0.025776 | 0.121007 |
| Dnm1l    | 918.16267 | -0.10222995  | 0.046082 | -2.21843 | 0.026526 | 0.123094 |
| Lsr      | 68.45968  | 0.414949055  | 0.187396 | 2.214288 | 0.026809 | 0.1236   |
| Olfr3    | 301.687   | -0.224128834 | 0.101875 | -2.20005 | 0.027804 | 0.127359 |
| C1s1     | 28.085174 | 0.677258737  | 0.308653 | 2.19424  | 0.028218 | 0.128429 |
| Fth1     | 116268.76 | 0.223940414  | 0.102494 | 2.184919 | 0.028895 | 0.130671 |
| Ccnh     | 778.34957 | -0.129253155 | 0.059504 | -2.17219 | 0.029841 | 0.134055 |
| Ggta1    | 38.71406  | 0.400911873  | 0.18498  | 2.167331 | 0.03021  | 0.134055 |
| Ppp2ca   | 3262.8651 | -0.108498259 | 0.050059 | -2.16742 | 0.030203 | 0.134055 |
| C1ra     | 32.926692 | 0.892569184  | 0.412841 | 2.162016 | 0.030617 | 0.135019 |
| Atp2b4   | 207.06103 | 0.22779596   | 0.106516 | 2.138606 | 0.032468 | 0.141639 |
| H2-T23   | 56.050954 | 0.436670488  | 0.204477 | 2.135543 | 0.032717 | 0.141639 |
| Mbtps1   | 211.84617 | 0.218767014  | 0.102355 | 2.137346 | 0.03257  | 0.141639 |
| Cacnb2   | 83.864175 | 0.284672603  | 0.133476 | 2.132757 | 0.032945 | 0.141762 |
| Prkcq    | 112.09157 | 0.363016844  | 0.170915 | 2.123961 | 0.033673 | 0.144025 |
| Erlec1   | 348.89278 | -0.139394894 | 0.065726 | -2.12086 | 0.033934 | 0.144269 |
| Psmc6    | 1093.8972 | -0.135298837 | 0.06392  | -2.1167  | 0.034285 | 0.144897 |
| Ndufa10  | 1219.3093 | 0.12408853   | 0.058891 | 2.107085 | 0.03511  | 0.147504 |
| Atp6v1c1 | 1682.1772 | -0.097294874 | 0.046318 | -2.10057 | 0.035678 | 0.149009 |
| Myrf     | 277.6636  | -0.266600606 | 0.12796  | -2.08346 | 0.037209 | 0.152709 |
| Nf1      | 249.38678 | 0.207410071  | 0.09936  | 2.087462 | 0.036846 | 0.152709 |
| Tomm20   | 1476.7659 | -0.140154902 | 0.067195 | -2.08581 | 0.036996 | 0.152709 |
| Fcgr1    | 44.057058 | 0.349974526  | 0.168698 | 2.074566 | 0.038027 | 0.155167 |
| Ckb      | 11981.469 | -0.17490558  | 0.084761 | -2.06351 | 0.039064 | 0.157404 |
| Dnaja2   | 488.27328 | 0.131369333  | 0.063649 | 2.063967 | 0.039021 | 0.157404 |
| Psmc14   | 1114.9068 | 0.097025615  | 0.047062 | 2.06166  | 0.03924  | 0.157404 |
| Aplp2    | 3662.4182 | 0.12812184   | 0.062341 | 2.05519  | 0.039861 | 0.158345 |
| Olig2    | 58.06381  | -0.408394057 | 0.198774 | -2.05457 | 0.039921 | 0.158345 |
| Igtp     | 36.424239 | 0.533815516  | 0.260688 | 2.047715 | 0.040588 | 0.160097 |
| Prkar1a  | 3079.9248 | -0.073266571 | 0.036003 | -2.03501 | 0.04185  | 0.164164 |

|           |           |              |          |          |          |          |
|-----------|-----------|--------------|----------|----------|----------|----------|
| Dusp3     | 262.02622 | -0.193452462 | 0.095426 | -2.02725 | 0.042637 | 0.165601 |
| Ywhaz     | 2401.2836 | 0.101036365  | 0.04985  | 2.026797 | 0.042683 | 0.165601 |
| Cst3      | 12873.402 | -0.205637335 | 0.101596 | -2.02407 | 0.042963 | 0.165781 |
| Lgmn      | 2332.5638 | 0.076936456  | 0.038152 | 2.016584 | 0.043739 | 0.167241 |
| Slc25a4   | 7919.0089 | -0.136269786 | 0.067598 | -2.01588 | 0.043812 | 0.167241 |
| Fa2h      | 390.50978 | -0.236572519 | 0.117845 | -2.00748 | 0.044698 | 0.169709 |
| Tlr4      | 44.075327 | 0.469768732  | 0.235003 | 1.998992 | 0.045609 | 0.172248 |
| Cd163     | 30.895105 | 0.658590184  | 0.329887 | 1.996413 | 0.045889 | 0.172264 |
| Cd33      | 34.866171 | 0.429767284  | 0.215478 | 1.994487 | 0.046099 | 0.172264 |
| Cd200     | 381.15777 | 0.171320739  | 0.086018 | 1.991683 | 0.046406 | 0.172503 |
| Dync1li1  | 141.37395 | 0.218521933  | 0.110172 | 1.983463 | 0.047316 | 0.17497  |
| Eid1      | 1294.1291 | 0.119752675  | 0.060652 | 1.974437 | 0.048332 | 0.176748 |
| Htr5a     | 22.368085 | -0.5223964   | 0.264791 | -1.97286 | 0.048512 | 0.176748 |
| Tspan7    | 1807.788  | -0.12370387  | 0.062712 | -1.97258 | 0.048544 | 0.176748 |
| Rtn4      | 2366.1152 | -0.089638971 | 0.045591 | -1.96614 | 0.049283 | 0.178525 |
| C1qc      | 367.64967 | 0.232573326  | 0.119552 | 1.945379 | 0.051729 | 0.186436 |
| Serping1  | 228.25854 | 1.009966621  | 0.521369 | 1.937142 | 0.052728 | 0.189075 |
| Prkcz     | 267.04605 | -0.1788274   | 0.092433 | -1.93467 | 0.053031 | 0.189204 |
| Sec61a2   | 162.20717 | -0.194787484 | 0.101221 | -1.92437 | 0.054308 | 0.192794 |
| Cspg4     | 51.869723 | 0.38214487   | 0.199737 | 1.913243 | 0.055717 | 0.195837 |
| Pccb      | 299.76324 | 0.175505514  | 0.091666 | 1.914625 | 0.05554  | 0.195837 |
| Cd14      | 30.459117 | 0.441858221  | 0.231484 | 1.908805 | 0.056287 | 0.196867 |
| Atp6v1b2  | 2271.7939 | 0.117829008  | 0.061882 | 1.90409  | 0.056898 | 0.198029 |
| Bdnf      | 66.561949 | 0.283584286  | 0.150669 | 1.882169 | 0.059813 | 0.207157 |
| Mapk1     | 1238.9263 | 0.084570581  | 0.045085 | 1.875785 | 0.060685 | 0.209156 |
| Cd84      | 51.449502 | 0.315232906  | 0.169155 | 1.863571 | 0.062382 | 0.213601 |
| Sall3     | 60.668186 | -0.31102803  | 0.167214 | -1.86006 | 0.062877 | 0.213601 |
| Slc1a3    | 618.14622 | -0.220091733 | 0.11822  | -1.86171 | 0.062644 | 0.213601 |
| Epb41l3   | 1315.8256 | -0.139522575 | 0.075238 | -1.85441 | 0.06368  | 0.215299 |
| Cpne2     | 140.75773 | 0.292010529  | 0.157928 | 1.849009 | 0.064457 | 0.216892 |
| Mapk14    | 268.69343 | 0.145953439  | 0.079152 | 1.843967 | 0.065188 | 0.218318 |
| Snap25    | 7624.1077 | -0.105812018 | 0.057542 | -1.83885 | 0.065937 | 0.218792 |
| Tusc3     | 531.62384 | -0.120003111 | 0.065336 | -1.8367  | 0.066254 | 0.218792 |
| Zfp365    | 430.10893 | -0.219568664 | 0.119421 | -1.83862 | 0.065972 | 0.218792 |
| Atp6v1e1  | 1803.5455 | -0.127455256 | 0.069618 | -1.83077 | 0.067135 | 0.220676 |
| Ctnnb1    | 1917.1778 | -0.104109546 | 0.056976 | -1.82727 | 0.06766  | 0.221376 |
| Stab1     | 21.959226 | 0.540031463  | 0.296593 | 1.820781 | 0.06864  | 0.223553 |
| Atp6v1a   | 1667.4748 | -0.113749208 | 0.062752 | -1.81267 | 0.069882 | 0.226559 |
| Tbp       | 137.93984 | -0.175832507 | 0.09757  | -1.80211 | 0.071527 | 0.230839 |
| Adcyap1r1 | 702.41721 | -0.182396494 | 0.101546 | -1.7962  | 0.072462 | 0.231748 |
| Klrb1     | 8.7103191 | -0.657559027 | 0.365909 | -1.79706 | 0.072327 | 0.231748 |
| Cx3cl1    | 136.07093 | -0.211043993 | 0.118213 | -1.78529 | 0.074214 | 0.236286 |
| Srgn      | 248.83066 | 0.388876591  | 0.21908  | 1.775044 | 0.075891 | 0.240546 |
| Slc24a3   | 142.81819 | -0.197130235 | 0.111955 | -1.7608  | 0.078272 | 0.246991 |
| Ass1      | 178.0193  | 0.232072534  | 0.132092 | 1.756898 | 0.078935 | 0.247929 |
| Csnk2a2   | 263.27314 | 0.134292246  | 0.076522 | 1.754952 | 0.079268 | 0.247929 |
| Usp2      | 152.61952 | 0.192364492  | 0.109833 | 1.751421 | 0.079873 | 0.248729 |



|          |           |              |          |          |          |          |
|----------|-----------|--------------|----------|----------|----------|----------|
| Becn1    | 291.86775 | -0.151551823 | 0.086839 | -1.7452  | 0.08095  | 0.249888 |
| Ccl2     | 17.354513 | 0.68645349   | 0.39331  | 1.745326 | 0.080928 | 0.249888 |
| Atp6v1h  | 2528.898  | -0.131754149 | 0.075727 | -1.73986 | 0.081883 | 0.250591 |
| Lamp2    | 1557.1282 | 0.149439211  | 0.085847 | 1.740765 | 0.081725 | 0.250591 |
| Axl      | 313.26863 | 0.170845834  | 0.098375 | 1.736678 | 0.082444 | 0.251224 |
| Cntnap1  | 380.90842 | -0.175311607 | 0.101074 | -1.73448 | 0.082832 | 0.251329 |
| Agmo     | 267.76857 | -0.266590577 | 0.154258 | -1.72821 | 0.08395  | 0.253277 |
| Ulk1     | 83.431585 | 0.428237734  | 0.247982 | 1.726888 | 0.084188 | 0.253277 |
| Sall1    | 216.90646 | -0.198281614 | 0.115082 | -1.72295 | 0.084897 | 0.254332 |
| Plxnb3   | 125.28425 | -0.245347937 | 0.142634 | -1.72013 | 0.08541  | 0.254794 |
| Acot13   | 771.28825 | -0.151147184 | 0.088916 | -1.69988 | 0.089153 | 0.261564 |
| Grm1     | 110.99253 | -0.241718146 | 0.14218  | -1.70008 | 0.089115 | 0.261564 |
| Sox2     | 316.43085 | -0.235631645 | 0.138411 | -1.70241 | 0.088679 | 0.261564 |
| Tpi1     | 217.87584 | -0.138484433 | 0.081246 | -1.7045  | 0.088288 | 0.261564 |
| Cybb     | 31.56807  | 0.4767744    | 0.280867 | 1.697508 | 0.089601 | 0.261796 |
| Ms4a4a   | 22.214749 | 0.504549376  | 0.298254 | 1.691678 | 0.090707 | 0.263944 |
| P2ry1    | 205.15406 | 0.200214388  | 0.118971 | 1.682882 | 0.092398 | 0.267765 |
| Gabra4   | 62.717038 | -0.247068685 | 0.147678 | -1.67303 | 0.094322 | 0.271723 |
| Ncam1    | 1210.8415 | -0.158490365 | 0.094792 | -1.67198 | 0.094529 | 0.271723 |
| S100a10  | 1390.2026 | 0.502393975  | 0.302579 | 1.660371 | 0.09684  | 0.277243 |
| Lamp1    | 2177.9804 | -0.078828879 | 0.048343 | -1.63061 | 0.102972 | 0.292224 |
| Tnfrsf21 | 430.077   | -0.135183275 | 0.082913 | -1.63042 | 0.103013 | 0.292224 |
| Uchl1    | 781.63243 | -0.134625757 | 0.082642 | -1.62903 | 0.103307 | 0.292224 |
| Rnf10    | 687.45343 | 0.096182665  | 0.059333 | 1.62107  | 0.105003 | 0.295841 |
| Abcg2    | 274.053   | 0.244234676  | 0.151193 | 1.615386 | 0.106227 | 0.298108 |
| Plekhb1  | 10526.893 | -0.163835915 | 0.102561 | -1.59745 | 0.110166 | 0.306738 |
| Stxbp1   | 1856.7602 | -0.138050977 | 0.086327 | -1.59917 | 0.109784 | 0.306738 |
| Igf1     | 37.815848 | 0.430857922  | 0.270841 | 1.590812 | 0.111652 | 0.308454 |
| Il10ra   | 25.566443 | 0.32913705   | 0.206736 | 1.592063 | 0.111371 | 0.308454 |
| Got1     | 2250.5217 | -0.129703084 | 0.081734 | -1.58689 | 0.112538 | 0.309582 |
| Jak1     | 639.31022 | 0.139353526  | 0.087912 | 1.585151 | 0.112932 | 0.309582 |
| Chil1    | 179.53054 | -0.187455887 | 0.11864  | -1.58004 | 0.114097 | 0.311573 |
| C1qb     | 385.01065 | 0.208070118  | 0.131865 | 1.577907 | 0.114587 | 0.311712 |
| Mki67    | 15.858865 | -0.654003985 | 0.415383 | -1.57446 | 0.115381 | 0.312674 |
| Nrcam    | 543.77288 | -0.117483989 | 0.075053 | -1.56535 | 0.1175   | 0.317206 |
| C9orf72  | 296.86208 | -0.128881359 | 0.082658 | -1.55922 | 0.118944 | 0.319888 |
| Atp9a    | 1006.471  | -0.08947677  | 0.058084 | -1.54047 | 0.123446 | 0.323599 |
| Camk2g   | 944.22008 | 0.116090597  | 0.075451 | 1.53863  | 0.123895 | 0.323599 |
| Cd109    | 48.680383 | 0.502208013  | 0.32679  | 1.536793 | 0.124344 | 0.323599 |
| Chrm2    | 202.69118 | -0.161134437 | 0.104043 | -1.54873 | 0.121447 | 0.323599 |
| Cnr1     | 258.21739 | -0.138998204 | 0.090067 | -1.54327 | 0.122766 | 0.323599 |
| Jak2     | 222.00672 | -0.159465735 | 0.103788 | -1.53646 | 0.124426 | 0.323599 |
| Kitl     | 234.85531 | 0.157821532  | 0.102262 | 1.543299 | 0.122758 | 0.323599 |
| Lpar6    | 49.386345 | 0.260165487  | 0.167807 | 1.550388 | 0.121048 | 0.323599 |
| Serpine2 | 2066.7947 | -0.161834361 | 0.104718 | -1.54543 | 0.122243 | 0.323599 |
| Gpm6a    | 3465.9162 | -0.116777949 | 0.076267 | -1.53118 | 0.125724 | 0.325782 |
| Fcrls    | 69.487059 | 0.240319374  | 0.15722  | 1.528553 | 0.126375 | 0.326229 |

|          |           |              |          |          |          |          |
|----------|-----------|--------------|----------|----------|----------|----------|
| Kcnd1    | 55.894675 | 0.541422069  | 0.354617 | 1.52678  | 0.126816 | 0.326229 |
| Adam22   | 364.46814 | -0.110930048 | 0.072993 | -1.51974 | 0.128577 | 0.328381 |
| Gas7     | 316.06422 | 0.121125641  | 0.079638 | 1.520961 | 0.12827  | 0.328381 |
| Gpnmb    | 27.872364 | 0.434477527  | 0.289801 | 1.499227 | 0.133815 | 0.339316 |
| Prkci    | 230.53261 | 0.131816592  | 0.087908 | 1.499486 | 0.133748 | 0.339316 |
| Chn1     | 1022.5687 | -0.084968406 | 0.056759 | -1.49702 | 0.134389 | 0.339559 |
| Adrb1    | 23.443688 | 0.354742345  | 0.238835 | 1.485302 | 0.137464 | 0.342454 |
| Cntnap2  | 183.0969  | -0.156976609 | 0.105642 | -1.48593 | 0.137298 | 0.342454 |
| Ptprc    | 24.031464 | 0.346113399  | 0.232456 | 1.48894  | 0.136503 | 0.342454 |
| Sod1     | 3114.755  | -0.092143268 | 0.061859 | -1.48957 | 0.136337 | 0.342454 |
| Atg2b    | 222.79819 | 0.147293928  | 0.100018 | 1.472673 | 0.140839 | 0.346503 |
| Entpd1   | 65.235894 | 0.2301774    | 0.156186 | 1.473737 | 0.140552 | 0.346503 |
| Entpd2   | 79.349646 | 0.21533263   | 0.146473 | 1.47012  | 0.141529 | 0.346503 |
| Galc     | 165.97489 | -0.137930678 | 0.093405 | -1.47669 | 0.139759 | 0.346503 |
| Tap1     | 32.768175 | 0.321957128  | 0.218885 | 1.470898 | 0.141319 | 0.346503 |
| Ptpm     | 187.53435 | 0.137805396  | 0.095083 | 1.449318 | 0.147249 | 0.359267 |
| Il18     | 260.2459  | -0.183343732 | 0.126881 | -1.44501 | 0.148456 | 0.360972 |
| C3ar1    | 46.25831  | 0.286212544  | 0.199261 | 1.436369 | 0.150897 | 0.365656 |
| Map1lc3b | 1131.0747 | -0.065733999 | 0.046203 | -1.42274 | 0.154812 | 0.373867 |
| Gdpd2    | 77.616859 | -0.184719924 | 0.130752 | -1.41275 | 0.157729 | 0.37962  |
| Slc2a5   | 31.070186 | 0.387808325  | 0.275044 | 1.409988 | 0.158543 | 0.380289 |
| Slc8a1   | 1024.0293 | -0.13149476  | 0.094063 | -1.39795 | 0.162129 | 0.387582 |
| Atp1a1   | 1189.2345 | 0.208553006  | 0.149687 | 1.393262 | 0.163541 | 0.38834  |
| Unc80    | 446.77462 | 0.117993115  | 0.084672 | 1.393531 | 0.163459 | 0.38834  |
| Cd68     | 92.675915 | 0.195675543  | 0.14064  | 1.391318 | 0.164129 | 0.388439 |
| B2m      | 2078.9027 | 0.185500414  | 0.134183 | 1.382439 | 0.166837 | 0.390938 |
| Esam     | 98.316357 | 0.187978629  | 0.135837 | 1.383853 | 0.166404 | 0.390938 |
| Nmnat2   | 609.3624  | 0.098467248  | 0.071115 | 1.38461  | 0.166172 | 0.390938 |
| Ifit1    | 45.812873 | 0.425059946  | 0.308272 | 1.378848 | 0.167942 | 0.390946 |
| Slc46a1  | 31.913628 | -0.259628873 | 0.188135 | -1.38001 | 0.167583 | 0.390946 |
| Gphn     | 400.9774  | -0.113581725 | 0.082585 | -1.37532 | 0.169031 | 0.392197 |
| Acsl4    | 317.59984 | 0.13920014   | 0.102101 | 1.363353 | 0.172771 | 0.396857 |
| Ppp3cb   | 1202.5065 | 0.0629929    | 0.046149 | 1.365    | 0.172253 | 0.396857 |
| Rlim     | 574.3823  | -0.102530352 | 0.075293 | -1.36175 | 0.173276 | 0.396857 |
| Tmem47   | 819.6131  | 0.082443518  | 0.06038  | 1.365402 | 0.172127 | 0.396857 |
| Ube4b    | 255.94323 | 0.147774667  | 0.108802 | 1.358202 | 0.1744   | 0.398147 |
| Atf2     | 279.7233  | -0.097011448 | 0.071886 | -1.34952 | 0.177169 | 0.403174 |
| Spi1     | 48.28039  | 0.271389679  | 0.201742 | 1.345232 | 0.17855  | 0.405018 |
| Arpc1a   | 1242.0607 | -0.059145944 | 0.044426 | -1.33134 | 0.183077 | 0.413965 |
| Calm2    | 3346.0991 | -0.117562153 | 0.089302 | -1.31645 | 0.188021 | 0.422453 |
| Sh3gl2   | 1687.4494 | -0.098593568 | 0.07489  | -1.31651 | 0.188004 | 0.422453 |
| Ddah1    | 586.56734 | -0.078066908 | 0.059898 | -1.30334 | 0.192458 | 0.429703 |
| Inpp5f   | 1154.7164 | -0.098411618 | 0.075499 | -1.30348 | 0.19241  | 0.429703 |
| Chchd3   | 304.26052 | 0.090161375  | 0.069653 | 1.294432 | 0.195516 | 0.433801 |
| Erbp3    | 63.131569 | -0.188284249 | 0.145421 | -1.29475 | 0.195406 | 0.433801 |
| Arntl    | 40.098356 | -0.21689526  | 0.169374 | -1.28057 | 0.200344 | 0.437591 |
| Chrn2    | 59.402052 | -0.196115638 | 0.153344 | -1.27893 | 0.200922 | 0.437591 |

|         |           |              |          |          |          |          |
|---------|-----------|--------------|----------|----------|----------|----------|
| Cltc    | 4364.0028 | 0.089479375  | 0.069786 | 1.282201 | 0.199772 | 0.437591 |
| Fgf13   | 561.76155 | 0.390556972  | 0.304932 | 1.280801 | 0.200264 | 0.437591 |
| Myct1   | 28.235996 | -0.254228459 | 0.19749  | -1.2873  | 0.19799  | 0.437591 |
| Slc9b2  | 52.598459 | 0.211384283  | 0.165194 | 1.279616 | 0.20068  | 0.437591 |
| Gnas    | 3453.1267 | -0.080349171 | 0.063367 | -1.268   | 0.204798 | 0.444668 |
| Adgrg1  | 61.870318 | -0.173612082 | 0.137909 | -1.25888 | 0.208072 | 0.4504   |
| Gjd2    | 88.578097 | -0.160730012 | 0.128213 | -1.25362 | 0.20998  | 0.453149 |
| Adh5    | 772.53972 | -0.098498423 | 0.079115 | -1.245   | 0.213131 | 0.45725  |
| Ccnb1   | 13.644069 | -0.439257421 | 0.352995 | -1.24437 | 0.213362 | 0.45725  |
| Vdac1   | 2082.5514 | -0.056884676 | 0.045759 | -1.24315 | 0.213813 | 0.45725  |
| P2rx7   | 81.070373 | 0.145735709  | 0.117401 | 1.241352 | 0.214476 | 0.457291 |
| Arl6ip5 | 865.96547 | 0.079959434  | 0.064763 | 1.234641 | 0.216964 | 0.459999 |
| Tgfb1   | 71.7533   | 0.171880743  | 0.139239 | 1.234432 | 0.217042 | 0.459999 |
| Rad23b  | 643.95341 | -0.062040192 | 0.050679 | -1.22419 | 0.220882 | 0.466744 |
| Itga7   | 37.869042 | 0.342562025  | 0.28063  | 1.220688 | 0.222204 | 0.468145 |
| Atp2a2  | 2603.5048 | 0.118211235  | 0.097722 | 1.209664 | 0.226408 | 0.47559  |
| Ccr5    | 54.920035 | 0.210092092  | 0.173992 | 1.207482 | 0.227247 | 0.475944 |
| Shc3    | 271.4527  | -0.09746346  | 0.081356 | -1.19798 | 0.230924 | 0.482223 |
| Casp3   | 79.528939 | 0.164024996  | 0.137688 | 1.191283 | 0.233542 | 0.483426 |
| Opcml   | 276.23361 | 0.109195895  | 0.091497 | 1.193433 | 0.2327   | 0.483426 |
| Trim2   | 951.31427 | 0.071269788  | 0.05977  | 1.192408 | 0.233101 | 0.483426 |
| Ubqln2  | 719.4773  | 0.09545224   | 0.080247 | 1.189485 | 0.234249 | 0.483479 |
| Orc5    | 231.11782 | -0.111558984 | 0.094269 | -1.18342 | 0.236644 | 0.487007 |
| Pmp22   | 637.66648 | 0.214483951  | 0.182687 | 1.174052 | 0.240374 | 0.491832 |
| Th      | 20.333767 | 0.501700043  | 0.426733 | 1.175677 | 0.239724 | 0.491832 |
| Gas6    | 729.80367 | 0.086273688  | 0.073768 | 1.169527 | 0.242191 | 0.49271  |
| Slc17a7 | 22.078828 | 0.433057043  | 0.369782 | 1.171114 | 0.241553 | 0.49271  |
| Wasf1   | 424.45175 | 0.089487394  | 0.076876 | 1.164052 | 0.244403 | 0.495789 |
| Crkl    | 170.83542 | -0.1178769   | 0.101489 | -1.16147 | 0.24545  | 0.496495 |
| Ywhah   | 3618.5556 | 0.082282085  | 0.071621 | 1.148854 | 0.250616 | 0.505504 |
| Slc17a6 | 471.08566 | -0.089653331 | 0.079364 | -1.12965 | 0.258624 | 0.520178 |
| Gria3   | 744.7284  | -0.091798546 | 0.08171  | -1.12347 | 0.261239 | 0.523954 |
| Gdnf    | 13.506538 | 0.399449279  | 0.356931 | 1.119122 | 0.263088 | 0.526176 |
| C3      | 403.0466  | -0.127128256 | 0.114005 | -1.11511 | 0.264804 | 0.528121 |
| Lta4h   | 233.48507 | 0.084041402  | 0.075923 | 1.106932 | 0.268323 | 0.53364  |
| Prkab2  | 72.977921 | 0.166514596  | 0.150725 | 1.104761 | 0.269263 | 0.534014 |
| Akt3    | 1023.465  | 0.069674926  | 0.063474 | 1.097696 | 0.272337 | 0.538606 |
| Cdk7    | 379.20177 | -0.075420959 | 0.06897  | -1.09354 | 0.274158 | 0.5407   |
| Atp6v1d | 1304.8434 | -0.069838524 | 0.064623 | -1.08071 | 0.279828 | 0.547323 |
| Mapt    | 571.33167 | -0.090201212 | 0.08341  | -1.08143 | 0.279508 | 0.547323 |
| Tlr7    | 11.648004 | 0.336704522  | 0.311325 | 1.081521 | 0.279466 | 0.547323 |
| Myorg   | 100.10641 | -0.125394186 | 0.116396 | -1.07731 | 0.281342 | 0.548772 |
| Fbln5   | 73.846985 | 0.288657172  | 0.269792 | 1.069924 | 0.284653 | 0.552196 |
| Ccdc127 | 500.90594 | 0.062674533  | 0.058574 | 1.070013 | 0.284613 | 0.552196 |
| Grin3a  | 365.78191 | -0.081676569 | 0.076995 | -1.06081 | 0.288777 | 0.558669 |
| Itgam   | 81.974988 | -0.131956616 | 0.124809 | -1.05727 | 0.290387 | 0.560258 |
| Nap1l2  | 236.51399 | 0.10639881   | 0.100812 | 1.055421 | 0.291233 | 0.560367 |

|           |           |              |          |          |          |          |
|-----------|-----------|--------------|----------|----------|----------|----------|
| Psen1     | 283.37535 | 0.08040245   | 0.07634  | 1.053213 | 0.292244 | 0.560792 |
| Klrd1     | 9.7585835 | 0.376445349  | 0.358383 | 1.050398 | 0.293535 | 0.561752 |
| Fam104a   | 219.38246 | -0.092786242 | 0.088764 | -1.04531 | 0.295878 | 0.564714 |
| Cux2      | 80.447927 | -0.143957763 | 0.138227 | -1.04146 | 0.297664 | 0.565084 |
| Rasgrp1   | 94.868524 | 0.491875048  | 0.472185 | 1.041699 | 0.297551 | 0.565084 |
| Tardbp    | 1510.2316 | -0.05318331  | 0.05122  | -1.03834 | 0.299114 | 0.566322 |
| Clcf1     | 14.488227 | -0.317349849 | 0.307615 | -1.03165 | 0.302238 | 0.570716 |
| Gad2      | 581.00426 | 0.076779238  | 0.074823 | 1.026148 | 0.304822 | 0.574067 |
| Crot      | 307.24648 | -0.086232942 | 0.084654 | -1.01866 | 0.308366 | 0.576157 |
| Cttnbp2nl | 51.485744 | -0.155828968 | 0.152703 | -1.02047 | 0.307505 | 0.576157 |
| Pik3r1    | 791.75533 | 0.058148354  | 0.057012 | 1.019927 | 0.307763 | 0.576157 |
| Adora3    | 9.1204696 | 0.379390013  | 0.374923 | 1.011915 | 0.311579 | 0.577877 |
| Ahcyl1    | 2065.7626 | -0.066993635 | 0.066493 | -1.00753 | 0.31368  | 0.577877 |
| B4galt5   | 151.6804  | 0.101357642  | 0.100432 | 1.009214 | 0.312872 | 0.577877 |
| F11r      | 90.498384 | 0.152357406  | 0.150436 | 1.012771 | 0.31117  | 0.577877 |
| Tnfrsf11a | 41.395273 | 0.20979932   | 0.208793 | 1.00482  | 0.314984 | 0.577877 |
| Trim45    | 47.35778  | -0.167687627 | 0.166612 | -1.00646 | 0.314197 | 0.577877 |
| Ywhag     | 3671.3352 | 0.077185454  | 0.076382 | 1.010512 | 0.31225  | 0.577877 |
| Ap3m2     | 284.00783 | -0.107574264 | 0.108266 | -0.99361 | 0.320414 | 0.583317 |
| Gpr34     | 119.72703 | -0.13922016  | 0.13995  | -0.99479 | 0.31984  | 0.583317 |
| Stmn1     | 1903.1521 | 0.055166364  | 0.055386 | 0.99604  | 0.319231 | 0.583317 |
| Dnajc5    | 1258.4175 | 0.04836338   | 0.049007 | 0.986863 | 0.32371  | 0.584529 |
| Hacd2     | 359.67499 | -0.075836023 | 0.077345 | -0.98049 | 0.326842 | 0.584529 |
| Prkcd     | 193.09079 | 0.438283664  | 0.445737 | 0.983279 | 0.32547  | 0.584529 |
| Tie1      | 50.263296 | 0.171074804  | 0.174379 | 0.981051 | 0.326568 | 0.584529 |
| Tomm70a   | 1701.6587 | -0.041304301 | 0.04187  | -0.98648 | 0.323897 | 0.584529 |
| Supt7l    | 74.309767 | 0.126126239  | 0.128091 | 0.984663 | 0.32479  | 0.584529 |
| Xpnpep1   | 276.18133 | 0.071590256  | 0.072324 | 0.989852 | 0.322246 | 0.584529 |
| Fbxw11    | 1103.057  | 0.043694956  | 0.04478  | 0.975767 | 0.32918  | 0.58723  |
| Calm1     | 6763.0332 | -0.045644855 | 0.046961 | -0.97197 | 0.331064 | 0.589111 |
| Bub3      | 483.15423 | 0.055045954  | 0.057521 | 0.956975 | 0.33858  | 0.600979 |
| Dlat      | 707.0363  | 0.048254452  | 0.05064  | 0.952886 | 0.340648 | 0.603142 |
| Gad1      | 404.88838 | -0.096630386 | 0.103665 | -0.93214 | 0.351262 | 0.614379 |
| Hmgb1     | 1313.374  | 0.078521014  | 0.084143 | 0.933187 | 0.350723 | 0.614379 |
| Rtn1      | 1412.3393 | 0.059851285  | 0.064216 | 0.932031 | 0.351321 | 0.614379 |
| Scp2      | 250.17708 | -0.156266135 | 0.1673   | -0.93405 | 0.350278 | 0.614379 |
| Sparc     | 5084.5977 | -0.074059879 | 0.078981 | -0.93769 | 0.348405 | 0.614379 |
| Fgf2      | 18.427182 | 0.25349841   | 0.272922 | 0.928832 | 0.352976 | 0.615757 |
| Tiam1     | 102.7806  | 0.110791954  | 0.119504 | 0.927098 | 0.353876 | 0.615813 |
| Slc12a5   | 528.24957 | -0.120858567 | 0.130835 | -0.92375 | 0.355618 | 0.617332 |
| Ctsf      | 527.63322 | -0.060326848 | 0.065469 | -0.92146 | 0.356812 | 0.6175   |
| Gpr84     | 9.3249375 | 0.331105225  | 0.359808 | 0.920227 | 0.357454 | 0.6175   |
| Cnot10    | 179.36921 | 0.089356613  | 0.097854 | 0.913167 | 0.361155 | 0.622378 |
| C1qa      | 532.49622 | 0.101406132  | 0.111295 | 0.911144 | 0.36222  | 0.622702 |
| Adcy5     | 311.44768 | -0.087136984 | 0.096879 | -0.89944 | 0.368416 | 0.631048 |
| Grm2      | 16.612677 | -0.227738604 | 0.25343  | -0.89863 | 0.368852 | 0.631048 |
| Atp8a2    | 486.31453 | 0.11596006   | 0.129315 | 0.896725 | 0.369866 | 0.631261 |

|           |           |              |          |          |          |          |
|-----------|-----------|--------------|----------|----------|----------|----------|
| Sugt1     | 878.36394 | 0.058711515  | 0.065983 | 0.889802 | 0.373572 | 0.636058 |
| Ccl3      | 14.89651  | 0.306422762  | 0.348013 | 0.880492 | 0.378593 | 0.641201 |
| Nlk       | 110.48876 | -0.107308672 | 0.122055 | -0.87918 | 0.379302 | 0.641201 |
| Ranbp9    | 620.40072 | -0.063743367 | 0.0723   | -0.88165 | 0.377968 | 0.641201 |
| Csf1r     | 309.06403 | 0.092206724  | 0.105533 | 0.873726 | 0.382267 | 0.643794 |
| Klhl12    | 194.15772 | 0.094041444  | 0.108131 | 0.869703 | 0.384463 | 0.643794 |
| Pik3cb    | 387.90361 | -0.073869597 | 0.084662 | -0.87253 | 0.38292  | 0.643794 |
| Unc79     | 746.80144 | -0.08498277  | 0.097602 | -0.87071 | 0.383914 | 0.643794 |
| Ap2m1     | 2552.9052 | 0.034239569  | 0.039453 | 0.867855 | 0.385474 | 0.643968 |
| Ptk2b     | 32.927528 | 0.182431584  | 0.211207 | 0.863759 | 0.38772  | 0.646201 |
| Gabarapl1 | 3705.7892 | 0.032774754  | 0.038465 | 0.852057 | 0.394183 | 0.653901 |
| Sirt5     | 88.381293 | -0.107849693 | 0.126379 | -0.85338 | 0.393446 | 0.653901 |
| Map2k1    | 1078.9371 | -0.041778735 | 0.049537 | -0.84338 | 0.399014 | 0.660373 |
| Ifngr2    | 219.54103 | -0.068560844 | 0.081974 | -0.83637 | 0.402947 | 0.66533  |
| Cyfp2     | 1490.388  | 0.065197806  | 0.07844  | 0.831176 | 0.405874 | 0.667061 |
| Sumo1     | 1018.132  | -0.093971557 | 0.112884 | -0.83246 | 0.405149 | 0.667061 |
| Cacna2d1  | 157.68809 | 0.100033474  | 0.121168 | 0.825579 | 0.409043 | 0.669172 |
| Txn1      | 2829.3565 | 0.195745177  | 0.237032 | 0.825816 | 0.408909 | 0.669172 |
| Elmo1     | 431.35231 | -0.067815549 | 0.082582 | -0.82119 | 0.411536 | 0.671703 |
| Itm2a     | 771.43824 | 0.093549942  | 0.115013 | 0.813383 | 0.415999 | 0.677429 |
| Diaph1    | 238.75761 | 0.069657767  | 0.085931 | 0.810623 | 0.417582 | 0.678452 |
| P2ry14    | 19.328508 | 0.210475607  | 0.260686 | 0.807392 | 0.41944  | 0.679915 |
| Irf8      | 15.648166 | 0.256212264  | 0.319221 | 0.802617 | 0.422196 | 0.681271 |
| Nckap1    | 1828.3386 | -0.030910321 | 0.038472 | -0.80346 | 0.42171  | 0.681271 |
| Sptan1    | 1346.3281 | -0.073398562 | 0.092385 | -0.79449 | 0.426912 | 0.687319 |
| Opa1      | 471.77786 | 0.051655257  | 0.065203 | 0.792227 | 0.428228 | 0.687878 |
| Atrn      | 585.77892 | -0.066038683 | 0.083545 | -0.79046 | 0.429261 | 0.687981 |
| Gabrd     | 13.405628 | -0.245994403 | 0.312922 | -0.78612 | 0.431797 | 0.690486 |
| Egf       | 11.67677  | 0.257442227  | 0.331823 | 0.775842 | 0.437842 | 0.693902 |
| Immt      | 828.5392  | 0.03794429   | 0.048875 | 0.77635  | 0.437542 | 0.693902 |
| Plaa      | 153.07576 | -0.088495554 | 0.113692 | -0.77838 | 0.436344 | 0.693902 |
| Slc38a1   | 676.14034 | -0.065127784 | 0.08366  | -0.77848 | 0.436287 | 0.693902 |
| Psmc6     | 1703.8204 | 0.067862407  | 0.087833 | 0.772627 | 0.439743 | 0.695362 |
| Cdk5r1    | 98.556084 | 0.088567673  | 0.115392 | 0.767535 | 0.442763 | 0.697994 |
| Fcgr4     | 9.6454456 | 0.276715313  | 0.361007 | 0.766509 | 0.443373 | 0.697994 |
| Tjp1      | 554.02696 | 0.046218013  | 0.060467 | 0.764345 | 0.444662 | 0.698473 |
| Bax       | 108.26943 | -0.091189439 | 0.119747 | -0.76152 | 0.446348 | 0.699574 |
| Ywhae     | 6382.8822 | 0.024809801  | 0.032686 | 0.75904  | 0.447829 | 0.700349 |
| Mertk     | 52.238162 | -0.128927091 | 0.170938 | -0.75424 | 0.450708 | 0.703303 |
| Grb2      | 470.35202 | 0.047087112  | 0.06275  | 0.750395 | 0.453017 | 0.705355 |
| Kcnab1    | 656.67357 | -0.049746206 | 0.066903 | -0.74355 | 0.457147 | 0.710229 |
| Adar      | 260.29796 | -0.07154351  | 0.09674  | -0.73955 | 0.459574 | 0.712441 |
| Adgrl4    | 92.29833  | 0.085160805  | 0.119157 | 0.714695 | 0.474798 | 0.715844 |
| Cacna1b   | 62.686867 | 0.119884606  | 0.167181 | 0.717094 | 0.473316 | 0.715844 |
| Ctsl      | 297.33677 | 0.135016041  | 0.187337 | 0.720713 | 0.471086 | 0.715844 |
| Dnajb9    | 498.15449 | 0.058937594  | 0.082589 | 0.713622 | 0.475461 | 0.715844 |
| Gla       | 134.36962 | -0.08564764  | 0.119617 | -0.71602 | 0.47398  | 0.715844 |

|          |           |              |          |          |          |          |
|----------|-----------|--------------|----------|----------|----------|----------|
| Gria4    | 759.18383 | -0.057301993 | 0.078385 | -0.73104 | 0.464757 | 0.715844 |
| Ip6k2    | 276.8593  | -0.051966202 | 0.072746 | -0.71435 | 0.475012 | 0.715844 |
| Jun      | 249.98999 | 0.087445229  | 0.122443 | 0.714173 | 0.47512  | 0.715844 |
| Pdpk1    | 356.71687 | 0.052516864  | 0.07217  | 0.727684 | 0.466807 | 0.715844 |
| Rasa1    | 160.86845 | 0.063056263  | 0.088373 | 0.713524 | 0.475522 | 0.715844 |
| Shank2   | 29.951246 | -0.142333895 | 0.196699 | -0.72361 | 0.469304 | 0.715844 |
| Sox9     | 136.07944 | -0.08082267  | 0.113366 | -0.71294 | 0.475885 | 0.715844 |
| Spp1     | 1468.9808 | -0.087162972 | 0.121245 | -0.7189  | 0.472204 | 0.715844 |
| Tsc1     | 171.71827 | -0.062162992 | 0.085935 | -0.72337 | 0.469451 | 0.715844 |
| Nlrp3    | 11.406416 | 0.287794021  | 0.406557 | 0.707882 | 0.479019 | 0.719034 |
| Braf     | 263.02753 | -0.060307314 | 0.085969 | -0.7015  | 0.482993 | 0.721947 |
| Ppt1     | 758.55646 | 0.051837332  | 0.073764 | 0.702743 | 0.482216 | 0.721947 |
| Cd9      | 938.10246 | 0.113619757  | 0.162926 | 0.69737  | 0.485571 | 0.724277 |
| Ret      | 197.71745 | 0.223179044  | 0.323611 | 0.689652 | 0.490413 | 0.729965 |
| Arpc2    | 668.85322 | -0.04179472  | 0.063334 | -0.65991 | 0.509314 | 0.737986 |
| Arpc5l   | 687.38878 | -0.052129203 | 0.078539 | -0.66374 | 0.506859 | 0.737986 |
| Camk2d   | 757.92228 | 0.057773477  | 0.086716 | 0.66624  | 0.505258 | 0.737986 |
| Cd6      | 8.8902869 | 0.253344098  | 0.377966 | 0.670283 | 0.502677 | 0.737986 |
| Dnm3     | 1440.0367 | -0.048146509 | 0.07262  | -0.66299 | 0.507335 | 0.737986 |
| Pcca     | 306.35028 | 0.053837001  | 0.080725 | 0.666918 | 0.504825 | 0.737986 |
| Prkce    | 391.79072 | 0.06250401   | 0.093033 | 0.671851 | 0.501679 | 0.737986 |
| Ptx3     | 15.979106 | -0.185723924 | 0.277229 | -0.66993 | 0.502903 | 0.737986 |
| Rab1a    | 2294.3156 | -0.031710132 | 0.04792  | -0.66174 | 0.50814  | 0.737986 |
| S100b    | 6177.7358 | -0.066627907 | 0.100941 | -0.66007 | 0.50921  | 0.737986 |
| Slc25a17 | 298.65483 | -0.058064664 | 0.08798  | -0.65997 | 0.509272 | 0.737986 |
| Trim68   | 30.707596 | -0.139609623 | 0.208263 | -0.67035 | 0.502633 | 0.737986 |
| Mto1     | 169.94877 | -0.068211924 | 0.100778 | -0.67686 | 0.498498 | 0.737986 |
| Stambpl1 | 161.51934 | 0.063268283  | 0.096496 | 0.655655 | 0.512046 | 0.740433 |
| Asns     | 366.5451  | 0.061049062  | 0.094343 | 0.647095 | 0.51757  | 0.7469   |
| Atr      | 102.6631  | 0.075053332  | 0.11685  | 0.642306 | 0.520675 | 0.749854 |
| Lrrc7    | 116.43134 | 0.103517534  | 0.161985 | 0.639058 | 0.522785 | 0.749854 |
| Rims1    | 237.48067 | -0.066771257 | 0.104295 | -0.64022 | 0.522032 | 0.749854 |
| Hsd17b4  | 337.81239 | -0.047107602 | 0.074595 | -0.63151 | 0.527708 | 0.755388 |
| Ank      | 995.53838 | 0.045822573  | 0.073238 | 0.625667 | 0.531534 | 0.75629  |
| Cx3cr1   | 135.1377  | -0.08988142  | 0.143386 | -0.62685 | 0.530759 | 0.75629  |
| Sgce     | 488.81283 | 0.041309688  | 0.065738 | 0.628402 | 0.529741 | 0.75629  |
| Rorb     | 155.99508 | -0.062450914 | 0.10098  | -0.61845 | 0.53628  | 0.761517 |
| Syn1     | 1376.329  | 0.055826165  | 0.090988 | 0.613557 | 0.539508 | 0.764572 |
| Mag      | 966.47174 | -0.07119942  | 0.116669 | -0.61027 | 0.541685 | 0.766128 |
| Dnm1     | 2567.5656 | 0.062938358  | 0.104617 | 0.601607 | 0.547435 | 0.769662 |
| Kcnd2    | 92.614105 | -0.086834554 | 0.143577 | -0.60479 | 0.545316 | 0.769662 |
| Ppp2r2b  | 416.62424 | -0.046305214 | 0.076823 | -0.60275 | 0.546675 | 0.769662 |
| B4galt6  | 550.36448 | 0.050012591  | 0.083488 | 0.599043 | 0.549144 | 0.770539 |
| Hsd11b1  | 301.43554 | 0.085702444  | 0.143761 | 0.596144 | 0.551079 | 0.771382 |
| Nwd1     | 111.10499 | -0.063281927 | 0.10653  | -0.59403 | 0.552492 | 0.771382 |
| Slc12a2  | 1010.5918 | -0.03643366  | 0.061581 | -0.59164 | 0.554091 | 0.771382 |
| Gusb     | 88.789657 | 0.070203786  | 0.118588 | 0.591999 | 0.553851 | 0.771382 |

|           |           |              |          |          |          |          |
|-----------|-----------|--------------|----------|----------|----------|----------|
| Mtor      | 155.75203 | -0.072429281 | 0.123182 | -0.58798 | 0.556543 | 0.773279 |
| Khsrp     | 112.80558 | 0.06299769   | 0.107941 | 0.583632 | 0.559468 | 0.775125 |
| Tmem88b   | 10.737617 | -0.213841226 | 0.366946 | -0.58276 | 0.560055 | 0.775125 |
| Dock3     | 444.15604 | 0.064833704  | 0.111652 | 0.580677 | 0.561458 | 0.775555 |
| Gmpr2     | 131.51208 | -0.056514708 | 0.097923 | -0.57713 | 0.563851 | 0.775841 |
| Srpr      | 536.49985 | 0.04578978   | 0.079264 | 0.577686 | 0.563476 | 0.775841 |
| Lrrc25    | 8.3728482 | 0.250558304  | 0.435558 | 0.575259 | 0.565116 | 0.776079 |
| Cpa3      | 10.70594  | 0.313137214  | 0.550887 | 0.568424 | 0.569747 | 0.780928 |
| Trem2     | 55.738335 | 0.117905973  | 0.20955  | 0.562663 | 0.573664 | 0.784781 |
| Slco2b1   | 20.304952 | -0.140973327 | 0.254547 | -0.55382 | 0.579702 | 0.791516 |
| Prkab1    | 99.99394  | 0.06527171   | 0.118304 | 0.551727 | 0.581135 | 0.79195  |
| Olfr110   | 9.7620675 | -0.204153013 | 0.371384 | -0.54971 | 0.58252  | 0.792316 |
| Acly      | 967.02202 | -0.050558167 | 0.095537 | -0.5292  | 0.596668 | 0.799403 |
| Atg5      | 306.43589 | -0.040236795 | 0.074944 | -0.53689 | 0.59134  | 0.799403 |
| Atp2b3    | 154.84596 | 0.077810986  | 0.145631 | 0.534301 | 0.593133 | 0.799403 |
| Bcas1     | 2777.8379 | 0.054301272  | 0.103238 | 0.525979 | 0.598903 | 0.799403 |
| Cacna1e   | 75.419069 | 0.086222092  | 0.162995 | 0.528987 | 0.596815 | 0.799403 |
| Glra3     | 91.904261 | -0.068661874 | 0.130572 | -0.52585 | 0.598989 | 0.799403 |
| Hdc       | 10.411562 | -0.18217905  | 0.338712 | -0.53786 | 0.590675 | 0.799403 |
| Ninj2     | 33.903269 | -0.132125678 | 0.247434 | -0.53398 | 0.593353 | 0.799403 |
| Pnoc      | 21.255328 | -0.129245834 | 0.243057 | -0.53175 | 0.594899 | 0.799403 |
| Ppm1a     | 1644.1967 | -0.021113992 | 0.039848 | -0.52987 | 0.596202 | 0.799403 |
| Cacna2d3  | 83.493791 | 0.062719348  | 0.121562 | 0.515944 | 0.605893 | 0.805588 |
| Lag3      | 25.795028 | 0.120459352  | 0.233417 | 0.51607  | 0.605806 | 0.805588 |
| Psmc2     | 1133.7106 | -0.021949123 | 0.042945 | -0.5111  | 0.609283 | 0.808581 |
| Abce1     | 463.01363 | 0.037132791  | 0.074223 | 0.500285 | 0.616875 | 0.813588 |
| Akt1      | 717.23953 | -0.026814131 | 0.053538 | -0.50084 | 0.616481 | 0.813588 |
| Amph      | 653.82092 | 0.033839879  | 0.069744 | 0.4852   | 0.627534 | 0.813588 |
| Bin1      | 1464.8422 | -0.041674034 | 0.084182 | -0.49504 | 0.620568 | 0.813588 |
| Cdc42     | 4084.9566 | 0.022920368  | 0.047296 | 0.484611 | 0.627952 | 0.813588 |
| Cdc7      | 28.542535 | 0.113164795  | 0.23234  | 0.487066 | 0.626212 | 0.813588 |
| Dclk1     | 461.68727 | -0.043161252 | 0.08827  | -0.48897 | 0.624865 | 0.813588 |
| Fpr1      | 12.130213 | 0.163977293  | 0.331005 | 0.495392 | 0.620323 | 0.813588 |
| Il21r     | 8.2639436 | 0.180686916  | 0.369655 | 0.488799 | 0.624984 | 0.813588 |
| Kctd12    | 20.794485 | 0.120535834  | 0.248582 | 0.484894 | 0.627752 | 0.813588 |
| Nefh      | 4160.0468 | 0.053718303  | 0.108788 | 0.49379  | 0.621454 | 0.813588 |
| Ptk2      | 256.99755 | 0.040164566  | 0.080807 | 0.497043 | 0.619158 | 0.813588 |
| Serpina3n | 166.2574  | -0.067438897 | 0.136957 | -0.49241 | 0.622431 | 0.813588 |
| Dld       | 1267.2552 | -0.038353835 | 0.080038 | -0.47919 | 0.6318   | 0.815418 |
| Mapk8     | 447.90868 | 0.028604502  | 0.05987  | 0.477775 | 0.632811 | 0.815418 |
| P2ry13    | 37.470781 | 0.095399505  | 0.199009 | 0.479373 | 0.631674 | 0.815418 |
| Trim17    | 22.386348 | 0.116223294  | 0.247816 | 0.46899  | 0.639077 | 0.822001 |
| Camk2a    | 211.07328 | 0.065396696  | 0.140044 | 0.466972 | 0.64052  | 0.822367 |
| Anapc7    | 26.027923 | -0.097878773 | 0.212197 | -0.46126 | 0.644609 | 0.823152 |
| Hpgds     | 47.150716 | -0.076971297 | 0.166583 | -0.46206 | 0.644039 | 0.823152 |
| Kcnq5     | 13.212504 | 0.144877336  | 0.312548 | 0.463536 | 0.64298  | 0.823152 |
| Kras      | 612.48342 | -0.026418903 | 0.058269 | -0.4534  | 0.650264 | 0.825916 |

|         |           |              |          |          |          |          |
|---------|-----------|--------------|----------|----------|----------|----------|
| Mad2l1  | 17.746811 | 0.123671536  | 0.272385 | 0.454032 | 0.649805 | 0.825916 |
| Parp2   | 64.349857 | 0.072163128  | 0.158847 | 0.454294 | 0.649617 | 0.825916 |
| Xk      | 85.907462 | 0.061847446  | 0.137694 | 0.449165 | 0.653313 | 0.828307 |
| Dnajc11 | 141.70164 | -0.045770805 | 0.10435  | -0.43863 | 0.660931 | 0.836472 |
| Mef2a   | 284.29318 | 0.039150381  | 0.090261 | 0.433748 | 0.664471 | 0.839456 |
| Fig4    | 201.76996 | -0.042710323 | 0.099999 | -0.42711 | 0.669302 | 0.839638 |
| Nsf     | 4657.4799 | 0.029416245  | 0.068883 | 0.427046 | 0.669345 | 0.839638 |
| P2ry6   | 13.408132 | 0.131807736  | 0.307898 | 0.428089 | 0.668586 | 0.839638 |
| Pmepa1  | 100.77592 | 0.065795024  | 0.153663 | 0.428178 | 0.668522 | 0.839638 |
| Sybu    | 123.72163 | 0.044408981  | 0.105138 | 0.422389 | 0.672741 | 0.842409 |
| Smad3   | 40.301699 | 0.078732795  | 0.188157 | 0.418442 | 0.675624 | 0.843046 |
| Trim35  | 122.1047  | 0.041609151  | 0.099078 | 0.419962 | 0.674513 | 0.843046 |
| Tyrobp  | 386.26507 | 0.065533528  | 0.160473 | 0.408376 | 0.682997 | 0.850751 |
| Syt1    | 584.29243 | 0.055782523  | 0.137614 | 0.405354 | 0.685217 | 0.852022 |
| Cables1 | 165.63238 | 0.043948308  | 0.108989 | 0.403236 | 0.686774 | 0.852172 |
| Csf1    | 311.64726 | -0.033319137 | 0.083236 | -0.4003  | 0.688939 | 0.852172 |
| Ticam1  | 30.749204 | 0.085419557  | 0.21271  | 0.401578 | 0.687995 | 0.852172 |
| Camk4   | 95.738741 | -0.058412502 | 0.148881 | -0.39234 | 0.694803 | 0.852192 |
| Cysltr1 | 20.967428 | 0.095619241  | 0.24019  | 0.398098 | 0.690558 | 0.852192 |
| Grm7    | 257.09253 | 0.04850156   | 0.124199 | 0.390513 | 0.696157 | 0.852192 |
| Scn1a   | 1230.3765 | -0.035322447 | 0.090354 | -0.39093 | 0.695847 | 0.852192 |
| Siglech | 96.360288 | 0.050341501  | 0.128498 | 0.391768 | 0.69523  | 0.852192 |
| Tbk1    | 135.63174 | 0.040205348  | 0.101984 | 0.394233 | 0.693409 | 0.852192 |
| Plcb4   | 432.11505 | 0.0286688    | 0.074389 | 0.38539  | 0.699949 | 0.855359 |
| Eloc    | 2112.7816 | -0.028598567 | 0.074755 | -0.38257 | 0.702042 | 0.856443 |
| Calm3   | 4748.8447 | -0.022854483 | 0.060478 | -0.3779  | 0.705506 | 0.857721 |
| Orc3    | 433.2634  | -0.027256952 | 0.071947 | -0.37885 | 0.704799 | 0.857721 |
| Cst7    | 10.585636 | -0.163631204 | 0.437602 | -0.37393 | 0.708459 | 0.859839 |
| Map3k4  | 166.92307 | 0.042582877  | 0.115567 | 0.368469 | 0.712524 | 0.863297 |
| Mal2    | 395.62964 | 0.100814528  | 0.275052 | 0.366528 | 0.713971 | 0.863576 |
| Abcc8   | 19.407596 | 0.091885891  | 0.259079 | 0.354663 | 0.722842 | 0.864322 |
| Acadm   | 309.81206 | -0.034161308 | 0.097809 | -0.34927 | 0.726889 | 0.864322 |
| Cdc27   | 340.80099 | 0.025726283  | 0.071923 | 0.357691 | 0.720574 | 0.864322 |
| Cep68   | 53.267593 | -0.053334588 | 0.146538 | -0.36396 | 0.715885 | 0.864322 |
| Chrm3   | 31.215306 | -0.068114058 | 0.195304 | -0.34876 | 0.72727  | 0.864322 |
| Cyp2u1  | 112.59943 | 0.054406101  | 0.155551 | 0.349764 | 0.726516 | 0.864322 |
| Nrxn1   | 489.14936 | 0.022797358  | 0.063477 | 0.359142 | 0.719489 | 0.864322 |
| Orc4    | 429.83232 | 0.024457917  | 0.070425 | 0.347292 | 0.728372 | 0.864322 |
| Rasgrf1 | 301.64629 | -0.030848009 | 0.089106 | -0.3462  | 0.729196 | 0.864322 |
| Trim46  | 167.64769 | -0.034079786 | 0.094766 | -0.35962 | 0.719131 | 0.864322 |
| Ube2g1  | 422.63567 | 0.026610846  | 0.076796 | 0.346513 | 0.728957 | 0.864322 |
| Tada2b  | 136.84257 | -0.040971935 | 0.114802 | -0.35689 | 0.721174 | 0.864322 |
| Cyp4x1  | 69.084772 | -0.048296097 | 0.142355 | -0.33927 | 0.73441  | 0.867606 |
| Trac    | 43.380537 | -0.067226049 | 0.197223 | -0.34086 | 0.733207 | 0.867606 |
| Alas1   | 144.30141 | -0.032142013 | 0.096017 | -0.33475 | 0.737811 | 0.867755 |
| Bace1   | 340.19088 | -0.030258934 | 0.090532 | -0.33423 | 0.738202 | 0.867755 |
| Nptn    | 2791.9265 | 0.018484083  | 0.055191 | 0.33491  | 0.737693 | 0.867755 |



|          |           |              |          |          |          |          |
|----------|-----------|--------------|----------|----------|----------|----------|
| Tmsb4x   | 26484.335 | 0.030113186  | 0.091361 | 0.329608 | 0.741696 | 0.87042  |
| Slc25a12 | 695.61521 | 0.025708535  | 0.079361 | 0.323942 | 0.745982 | 0.874005 |
| Hcn1     | 248.85772 | 0.036490112  | 0.115508 | 0.31591  | 0.752071 | 0.879687 |
| Amigo1   | 342.1066  | -0.030161987 | 0.099512 | -0.3031  | 0.761816 | 0.886703 |
| Map2     | 1908.055  | -0.025994021 | 0.085561 | -0.30381 | 0.761274 | 0.886703 |
| Rbx1     | 1535.0586 | 0.024858103  | 0.081686 | 0.304313 | 0.76089  | 0.886703 |
| Selenos  | 142.33976 | 0.029489365  | 0.100943 | 0.292138 | 0.770181 | 0.894601 |
| Sphk1    | 11.524802 | -0.104044145 | 0.357651 | -0.29091 | 0.771121 | 0.894601 |
| Rab3a    | 6244.6285 | -0.017959356 | 0.062132 | -0.28905 | 0.772542 | 0.894788 |
| Rapgef2  | 120.0585  | 0.032413486  | 0.11377  | 0.284905 | 0.775717 | 0.897002 |
| Ctsb     | 2057.8945 | 0.020038287  | 0.070817 | 0.282957 | 0.77721  | 0.897267 |
| Itpr1    | 192.41712 | -0.027492607 | 0.098043 | -0.28041 | 0.77916  | 0.898057 |
| Atp6v1g1 | 362.79327 | 0.018114143  | 0.066302 | 0.273207 | 0.784694 | 0.902971 |
| Tanc2    | 322.6376  | -0.028107891 | 0.104203 | -0.26974 | 0.787359 | 0.904571 |
| Cul2     | 515.02157 | 0.014559222  | 0.055049 | 0.264477 | 0.791412 | 0.906295 |
| Etv5     | 114.23014 | 0.02933736   | 0.110658 | 0.265116 | 0.79092  | 0.906295 |
| Rnasel   | 57.13087  | -0.037653337 | 0.147288 | -0.25564 | 0.798225 | 0.911158 |
| Rxfp1    | 17.51558  | 0.075240082  | 0.294228 | 0.25572  | 0.798167 | 0.911158 |
| Fbxl3    | 531.76986 | -0.021500073 | 0.089323 | -0.2407  | 0.809787 | 0.921135 |
| Ppm1l    | 175.1986  | -0.027714674 | 0.115321 | -0.24033 | 0.810078 | 0.921135 |
| Thy1     | 2316.275  | 0.013416182  | 0.05606  | 0.239319 | 0.810858 | 0.921135 |
| Grin2a   | 48.221727 | 0.040078426  | 0.170904 | 0.234508 | 0.81459  | 0.923896 |
| Egr1     | 126.76812 | -0.034237963 | 0.153798 | -0.22262 | 0.823834 | 0.9315   |
| Gabrb3   | 537.3898  | -0.017872053 | 0.080332 | -0.22248 | 0.823942 | 0.9315   |
| Rock2    | 431.60523 | -0.01307964  | 0.059687 | -0.21914 | 0.826543 | 0.9315   |
| Tmem119  | 26.808998 | -0.045312897 | 0.206769 | -0.21915 | 0.826535 | 0.9315   |
| Abi2     | 395.45772 | 0.015500027  | 0.074041 | 0.209343 | 0.83418  | 0.933307 |
| Gsk3b    | 825.32294 | -0.013816651 | 0.067304 | -0.20529 | 0.837347 | 0.933307 |
| Hadh     | 255.14138 | 0.016723797  | 0.079701 | 0.209832 | 0.833799 | 0.933307 |
| Kcnq3    | 192.18046 | 0.020209016  | 0.094534 | 0.213776 | 0.830722 | 0.933307 |
| Reep5    | 984.90988 | 0.018335782  | 0.088977 | 0.206074 | 0.836733 | 0.933307 |
| Scn8a    | 300.73256 | 0.02880984   | 0.136725 | 0.210714 | 0.833111 | 0.933307 |
| Tgfb1    | 113.63254 | 0.032894085  | 0.15881  | 0.207129 | 0.835909 | 0.933307 |
| Ctsd     | 4066.4475 | -0.011845145 | 0.058395 | -0.20284 | 0.839257 | 0.933969 |
| Mtmt4    | 211.42371 | -0.02215805  | 0.111187 | -0.19929 | 0.842039 | 0.935599 |
| Mapk9    | 856.31705 | -0.012071881 | 0.062189 | -0.19412 | 0.846086 | 0.938626 |
| Aldh1l1  | 302.12326 | -0.015086143 | 0.079897 | -0.18882 | 0.850234 | 0.938827 |
| Hmox1    | 50.381591 | -0.034729714 | 0.181501 | -0.19135 | 0.848254 | 0.938827 |
| Tm4sf1   | 245.4596  | 0.020567823  | 0.108807 | 0.18903  | 0.850069 | 0.938827 |
| Slpi     | 8.8353417 | -0.078135121 | 0.424192 | -0.1842  | 0.853858 | 0.941366 |
| Extl2    | 620.61135 | -0.012168003 | 0.069662 | -0.17467 | 0.861337 | 0.947825 |
| Gabra1   | 447.85904 | -0.012870322 | 0.074251 | -0.17334 | 0.862387 | 0.947825 |
| Meaf6    | 281.15654 | -0.014646309 | 0.08538  | -0.17154 | 0.863797 | 0.947907 |
| Acadsb   | 414.75776 | -0.012631404 | 0.07907  | -0.15975 | 0.873079 | 0.949107 |
| Anapc1   | 359.56621 | -0.011715065 | 0.072314 | -0.162   | 0.871304 | 0.949107 |
| App      | 7432.9788 | -0.01130977  | 0.069029 | -0.16384 | 0.869856 | 0.949107 |
| Dmd      | 125.34646 | 0.016656986  | 0.103317 | 0.161222 | 0.871918 | 0.949107 |

|          |           |              |          |          |          |          |
|----------|-----------|--------------|----------|----------|----------|----------|
| Gls      | 981.37973 | -0.00896828  | 0.054425 | -0.16478 | 0.869116 | 0.949107 |
| Mafb     | 26.500363 | 0.034042082  | 0.215096 | 0.158265 | 0.874248 | 0.949107 |
| Ncf1     | 43.854322 | -0.033905834 | 0.206558 | -0.16415 | 0.869616 | 0.949107 |
| Gabra5   | 272.65661 | -0.014470894 | 0.094497 | -0.15314 | 0.87829  | 0.950589 |
| Gria2    | 276.99037 | -0.013438834 | 0.08709  | -0.15431 | 0.877366 | 0.950589 |
| Aif1     | 169.11778 | -0.020243962 | 0.135447 | -0.14946 | 0.88119  | 0.951535 |
| Grik2    | 182.45942 | 0.013113498  | 0.088229 | 0.148631 | 0.881845 | 0.951535 |
| Lair1    | 20.808193 | -0.038339171 | 0.282002 | -0.13595 | 0.891858 | 0.960879 |
| Psm10    | 202.05733 | -0.014963887 | 0.11263  | -0.13286 | 0.894305 | 0.962055 |
| Flt1     | 64.377477 | 0.020261382  | 0.155902 | 0.129962 | 0.896596 | 0.962653 |
| Scoc     | 2281.433  | 0.007295317  | 0.056722 | 0.128616 | 0.897661 | 0.962653 |
| Ube2n    | 1800.0546 | 0.005877455  | 0.046273 | 0.127016 | 0.898928 | 0.962653 |
| Eif2b5   | 310.15911 | -0.00839788  | 0.067294 | -0.12479 | 0.900687 | 0.963084 |
| Adora1   | 85.90545  | 0.013693612  | 0.118009 | 0.116039 | 0.907622 | 0.96904  |
| Ermn     | 2467.4651 | 0.014085163  | 0.124469 | 0.113162 | 0.909902 | 0.970016 |
| Emcn     | 69.460818 | -0.014284134 | 0.135408 | -0.10549 | 0.915988 | 0.97447  |
| Gfap     | 8089.4889 | 0.012844068  | 0.12439  | 0.103257 | 0.917759 | 0.97447  |
| Hdac2    | 612.53944 | 0.006476627  | 0.063061 | 0.102704 | 0.918198 | 0.97447  |
| Nos1ap   | 87.503651 | -0.013440629 | 0.135427 | -0.09925 | 0.920943 | 0.975924 |
| Glul     | 8642.9847 | 0.006347148  | 0.065666 | 0.096659 | 0.922997 | 0.976081 |
| Ngf      | 16.725144 | -0.026387576 | 0.276467 | -0.09545 | 0.923961 | 0.976081 |
| Ptpn1    | 176.50431 | 0.00822066   | 0.088619 | 0.092764 | 0.926091 | 0.976081 |
| Thrb     | 108.55659 | 0.011892913  | 0.12908  | 0.092136 | 0.92659  | 0.976081 |
| Apoe     | 4339.0118 | -0.004794526 | 0.064551 | -0.07428 | 0.940791 | 0.976552 |
| Cldn5    | 243.00479 | 0.008894051  | 0.116369 | 0.07643  | 0.939077 | 0.976552 |
| Ctss     | 954.23098 | -0.00968776  | 0.11756  | -0.08241 | 0.934323 | 0.976552 |
| Dagla    | 88.959313 | 0.009113291  | 0.116438 | 0.078267 | 0.937616 | 0.976552 |
| Ina      | 1566.7141 | -0.008238287 | 0.094279 | -0.08738 | 0.930368 | 0.976552 |
| Nostrin  | 38.368567 | 0.014099349  | 0.17911  | 0.078719 | 0.937256 | 0.976552 |
| Plxdc2   | 512.64883 | 0.005246228  | 0.063875 | 0.082133 | 0.934541 | 0.976552 |
| Prkag1   | 717.40915 | -0.00438753  | 0.058995 | -0.07437 | 0.940715 | 0.976552 |
| Tmem100  | 24.675878 | 0.023177163  | 0.274098 | 0.084558 | 0.932613 | 0.976552 |
| Asb10    | 9.4701947 | 0.027946866  | 0.359703 | 0.077694 | 0.938071 | 0.976552 |
| Csf3r    | 22.391419 | -0.016582677 | 0.2794   | -0.05935 | 0.952672 | 0.980286 |
| Dlx1     | 13.940575 | -0.019006407 | 0.298047 | -0.06377 | 0.949153 | 0.980286 |
| Myo5a    | 808.52552 | 0.004532863  | 0.076016 | 0.05963  | 0.95245  | 0.980286 |
| Panx1    | 107.47188 | -0.009642325 | 0.149384 | -0.06455 | 0.948535 | 0.980286 |
| Prkdc    | 116.2049  | -0.007972826 | 0.117257 | -0.06799 | 0.94579  | 0.980286 |
| Trim3    | 449.90489 | -0.005220117 | 0.084097 | -0.06207 | 0.950505 | 0.980286 |
| Ifnar1   | 253.35911 | 0.004413561  | 0.081081 | 0.054434 | 0.956589 | 0.982892 |
| Atp6v0d1 | 1633.6634 | -0.002457178 | 0.054498 | -0.04509 | 0.964038 | 0.984844 |
| Cntf     | 250.76974 | -0.006741525 | 0.149424 | -0.04512 | 0.964014 | 0.984844 |
| Cul1     | 1022.767  | 0.002472225  | 0.053835 | 0.045922 | 0.963372 | 0.984844 |
| Hspa1a/b | 28.860718 | 0.013087003  | 0.287943 | 0.04545  | 0.963749 | 0.984844 |
| Basp1    | 423.1933  | -0.002612396 | 0.060974 | -0.04284 | 0.965826 | 0.985253 |
| Drd1     | 14.854509 | -0.010876413 | 0.286565 | -0.03795 | 0.969724 | 0.985636 |
| Kcnv1    | 22.39655  | -0.010087142 | 0.250369 | -0.04029 | 0.967863 | 0.985636 |

|           |           |              |          |          |          |          |
|-----------|-----------|--------------|----------|----------|----------|----------|
| Tenm4     | 131.29496 | 0.004392544  | 0.118237 | 0.03715  | 0.970365 | 0.985636 |
| Arg2      | 12.644965 | 0.010613851  | 0.316838 | 0.033499 | 0.973276 | 0.987098 |
| Stat2     | 86.056359 | -0.005093895 | 0.159896 | -0.03186 | 0.974586 | 0.987098 |
| Slc7a8    | 33.102962 | 0.005139647  | 0.190926 | 0.02692  | 0.978524 | 0.988321 |
| Syn2      | 953.40124 | 0.002479407  | 0.092332 | 0.026853 | 0.978577 | 0.988321 |
| Hk1       | 976.26845 | 0.001932366  | 0.085615 | 0.02257  | 0.981993 | 0.990362 |
| Cdc23     | 224.38437 | 0.000885773  | 0.084284 | 0.010509 | 0.991615 | 0.995823 |
| Gng2      | 734.44714 | -0.001122317 | 0.097697 | -0.01149 | 0.990834 | 0.995823 |
| Hspa9     | 1567.5962 | -0.000607238 | 0.04539  | -0.01338 | 0.989326 | 0.995823 |
| Npas2     | 69.874826 | -0.000991335 | 0.141379 | -0.00701 | 0.994405 | 0.997214 |
| Atp2b2    | 1175.3119 | 0.000242365  | 0.115933 | 0.002091 | 0.998332 | 0.999025 |
| Hectd1    | 469.4767  | -8.78E-05    | 0.071897 | -0.00122 | 0.999025 | 0.999025 |
| Abcc3     | 7.2662786 | -0.007424158 | 0.394963 | -0.0188  | 0.985003 | NA       |
| B3gnt5    | 6.3384825 | 0.21230075   | 0.457517 | 0.464028 | 0.642627 | NA       |
| Blk       | 8.1214082 | -0.269448496 | 0.394669 | -0.68272 | 0.494784 | NA       |
| Ccna1     | 5.2193066 | -0.156431264 | 0.501127 | -0.31216 | 0.75492  | NA       |
| Cd19      | 7.3089171 | 0.08619673   | 0.389746 | 0.221161 | 0.824967 | NA       |
| Cd200r1   | 3.8695903 | -0.116586036 | 0.604804 | -0.19277 | 0.847142 | NA       |
| Cd209e    | 4.0702325 | 0.224765557  | 0.527605 | 0.426011 | 0.6701   | NA       |
| Cd244a    | 6.641867  | 0.269366435  | 0.41908  | 0.642756 | 0.520382 | NA       |
| Cd3d      | 5.9403729 | 0.097480131  | 0.450264 | 0.216496 | 0.828602 | NA       |
| Cd3e      | 2.0971661 | 0.260114603  | 0.745096 | 0.349102 | 0.727013 | NA       |
| Cd3g      | 4.3768588 | 0.677229341  | 0.500252 | 1.353776 | 0.175808 | NA       |
| Cd4       | 5.3530604 | 0.054485082  | 0.582311 | 0.093567 | 0.925453 | NA       |
| Cd40      | 7.6569457 | 0.317738351  | 0.407438 | 0.779845 | 0.435482 | NA       |
| Cd8a      | 4.5984838 | 0.468894942  | 0.550489 | 0.851779 | 0.394337 | NA       |
| Cd8b1     | 4.4598151 | 0.833849175  | 0.550821 | 1.51383  | 0.130069 | NA       |
| Ceacam3   | 4.4145331 | -0.647052069 | 0.521685 | -1.24031 | 0.21486  | NA       |
| Cfi       | 5.4901184 | 0.390784571  | 0.487871 | 0.800999 | 0.423132 | NA       |
| Ctsw      | 4.58687   | 0.056071267  | 0.522635 | 0.107286 | 0.914562 | NA       |
| Cxcl15    | 5.7306602 | 0.162022829  | 0.458799 | 0.353145 | 0.72398  | NA       |
| Dlx2      | 6.0302567 | -0.181810927 | 0.465441 | -0.39062 | 0.696078 | NA       |
| Eomes     | 4.1149782 | -0.048338223 | 0.591348 | -0.08174 | 0.934852 | NA       |
| Fcrlb     | 5.4421261 | 0.433731275  | 0.447191 | 0.969901 | 0.332096 | NA       |
| Foxp3     | 2.9546189 | -0.0598239   | 0.607029 | -0.09855 | 0.921494 | NA       |
| Gzma      | 6.7072407 | 0.085007009  | 0.433959 | 0.195887 | 0.844698 | NA       |
| Gzmb      | 5.4740743 | -0.138326422 | 0.469833 | -0.29442 | 0.76844  | NA       |
| Il10      | 4.5636805 | 0.594058048  | 0.521502 | 1.139128 | 0.25465  | NA       |
| Il1a      | 6.6132454 | -0.163321154 | 0.466251 | -0.35029 | 0.726124 | NA       |
| Il1b      | 5.0501131 | 0.800412976  | 0.540458 | 1.48099  | 0.138609 | NA       |
| Il4       | 3.8832648 | 0.171054127  | 0.552784 | 0.309441 | 0.756986 | NA       |
| Il6       | 7.1409686 | -0.008056738 | 0.416181 | -0.01936 | 0.984555 | NA       |
| Itgax     | 4.4668189 | -0.326400091 | 0.557488 | -0.58548 | 0.558223 | NA       |
| Kir3dl1/2 | 4.388706  | -0.05980622  | 0.491939 | -0.12157 | 0.903238 | NA       |
| Klrk1     | 4.0787768 | 0.499498461  | 0.512394 | 0.974832 | 0.329643 | NA       |
| Ltc4s     | 6.4533089 | 0.167014271  | 0.412786 | 0.404602 | 0.68577  | NA       |
| Mapk13    | 6.389012  | 0.552578088  | 0.430205 | 1.284452 | 0.198984 | NA       |

|          |           |              |          |          |          |    |
|----------|-----------|--------------|----------|----------|----------|----|
| Ms4a1    | 5.8444248 | 0.364654944  | 0.431857 | 0.844388 | 0.398452 | NA |
| Ms4a2    | 7.6610195 | -0.189541372 | 0.391594 | -0.48403 | 0.628368 | NA |
| Msr1     | 6.4759405 | 0.783636991  | 0.539283 | 1.453109 | 0.146193 | NA |
| Mx1      | 6.4837187 | -0.575298106 | 0.455435 | -1.26318 | 0.206523 | NA |
| Ncr1     | 3.6119418 | -0.967039089 | 0.631589 | -1.53112 | 0.12574  | NA |
| Nkg7     | 5.9654923 | 0.452465238  | 0.423071 | 1.069479 | 0.284854 | NA |
| Nlrp1b   | 6.2805151 | -0.295490751 | 0.439143 | -0.67288 | 0.501023 | NA |
| Nos2     | 4.1910438 | -0.022834394 | 0.540492 | -0.04225 | 0.966301 | NA |
| Prf1     | 7.2544542 | 0.637652726  | 0.424939 | 1.500575 | 0.133466 | NA |
| Ptger4   | 8.0367592 | 0.169981485  | 0.476008 | 0.357098 | 0.721018 | NA |
| Pth2r    | 6.1993698 | 0.001785869  | 0.448274 | 0.003984 | 0.996821 | NA |
| Sh2d1a   | 7.456335  | 0.55225213   | 0.374853 | 1.473248 | 0.140684 | NA |
| Slc10a6  | 8.0122975 | 0.032663141  | 0.409499 | 0.079764 | 0.936425 | NA |
| Spib     | 7.9455336 | 0.571493912  | 0.422849 | 1.351531 | 0.176525 | NA |
| Tbr1     | 2.5971005 | 0.520713221  | 0.637899 | 0.816294 | 0.414332 | NA |
| Tbx21    | 1.5884473 | -0.478141379 | 0.815661 | -0.5862  | 0.557741 | NA |
| Tcl1     | 8.1404467 | 0.565761174  | 0.384256 | 1.472354 | 0.140925 | NA |
| Tfec     | 3.8642807 | -0.270826301 | 0.603732 | -0.44859 | 0.65373  | NA |
| Tgm1     | 5.0049979 | -0.47111464  | 0.539948 | -0.87252 | 0.382926 | NA |
| Tnf      | 4.5308092 | 0.477997447  | 0.510821 | 0.935744 | 0.349405 | NA |
| Tnfrsf17 | 4.7552457 | -0.614478718 | 0.562268 | -1.09286 | 0.274457 | NA |
| Tpsab1   | 3.1903298 | 0.125942009  | 0.607048 | 0.207466 | 0.835646 | NA |
| Tpsb2    | 4.0727047 | 0.568226345  | 0.592866 | 0.95844  | 0.337841 | NA |
| Trat1    | 3.501587  | -0.007070737 | 0.658973 | -0.01073 | 0.991439 | NA |
| Xcl1     | 3.146581  | -0.072328346 | 0.648944 | -0.11146 | 0.911255 | NA |
